# Supplementary material for: The Antidepressant Sertraline Affects Cell Signaling and Metabolism in Trichophyton rubrum
Source: MDPI journal article supplement (doi:10.3390/jof9020275), 2023-02-20
Supplement: s1 [file s1]

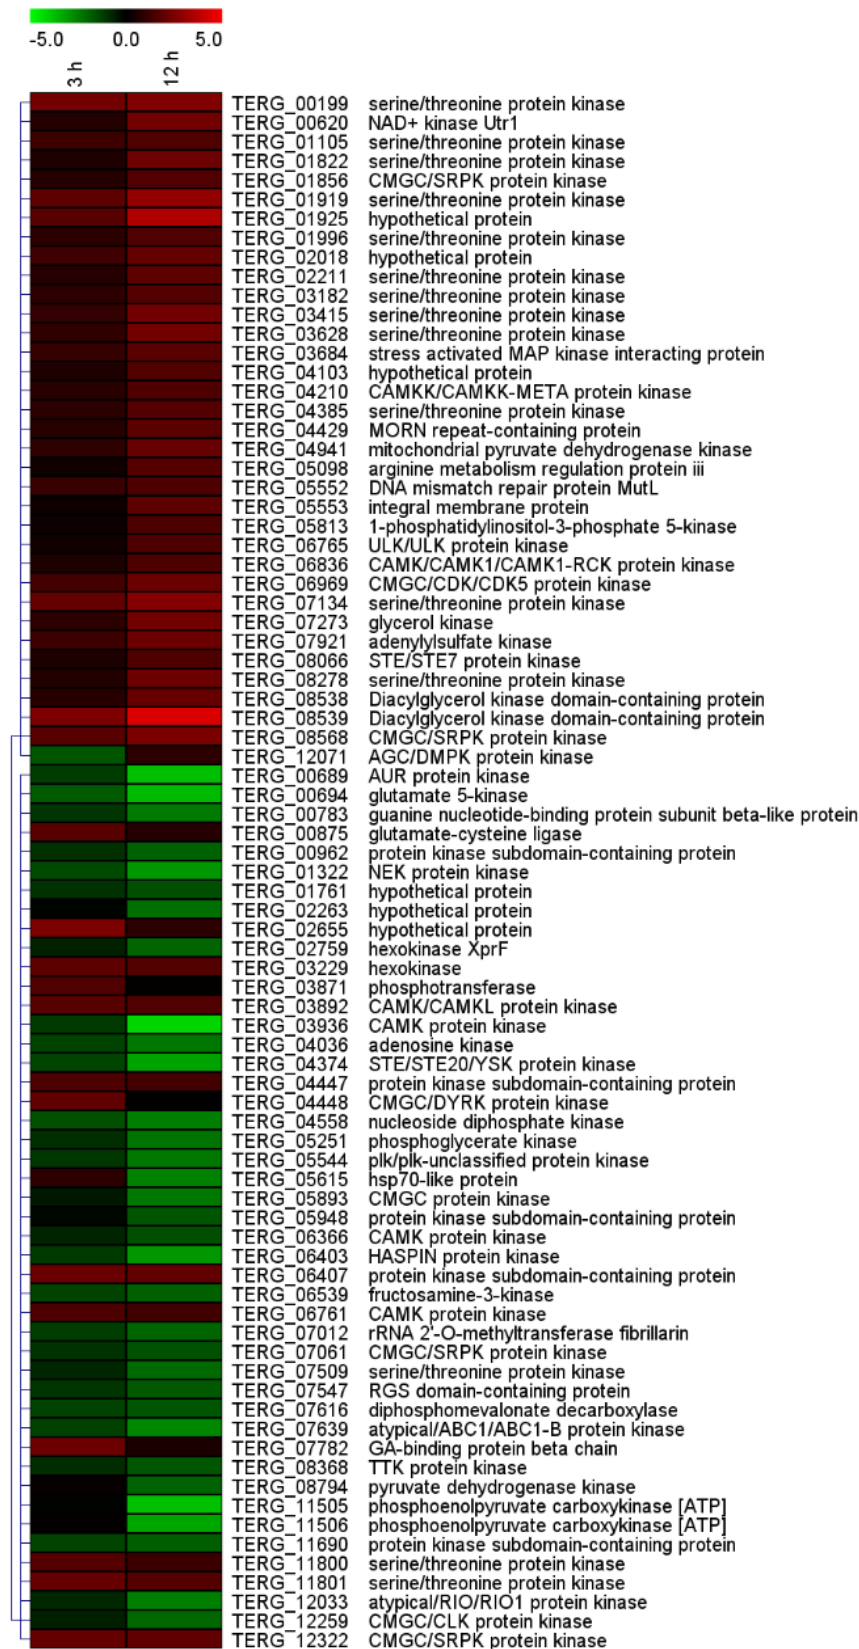

**Figure S1:** Kinase related genes modulated in response to SRT.

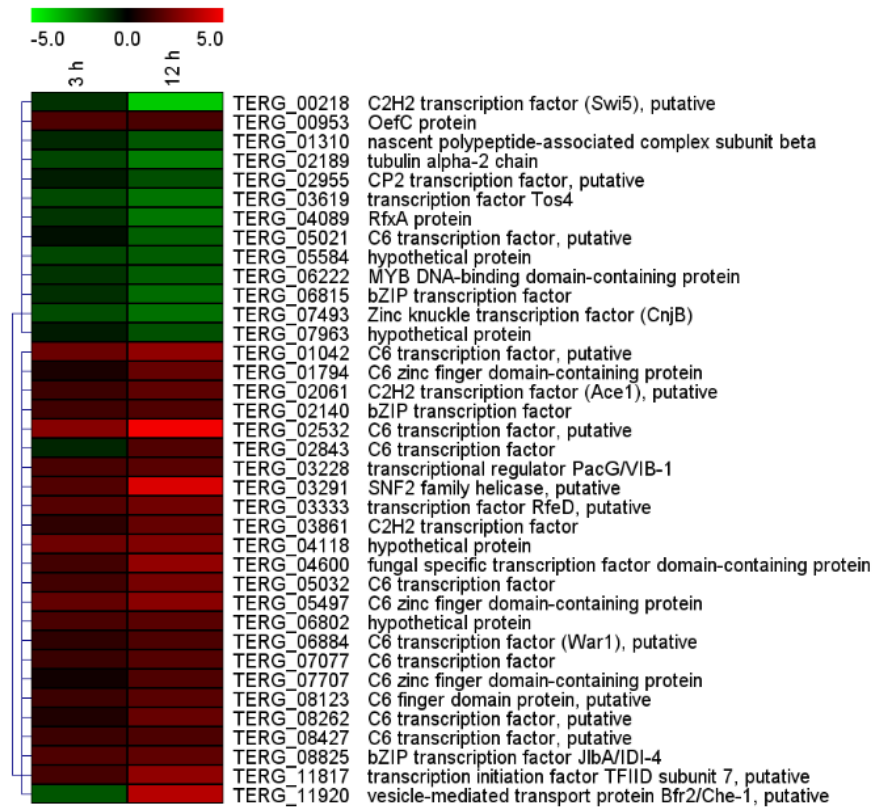

**Figure S2:** Transcription factors related genes modulated in response to SRT.

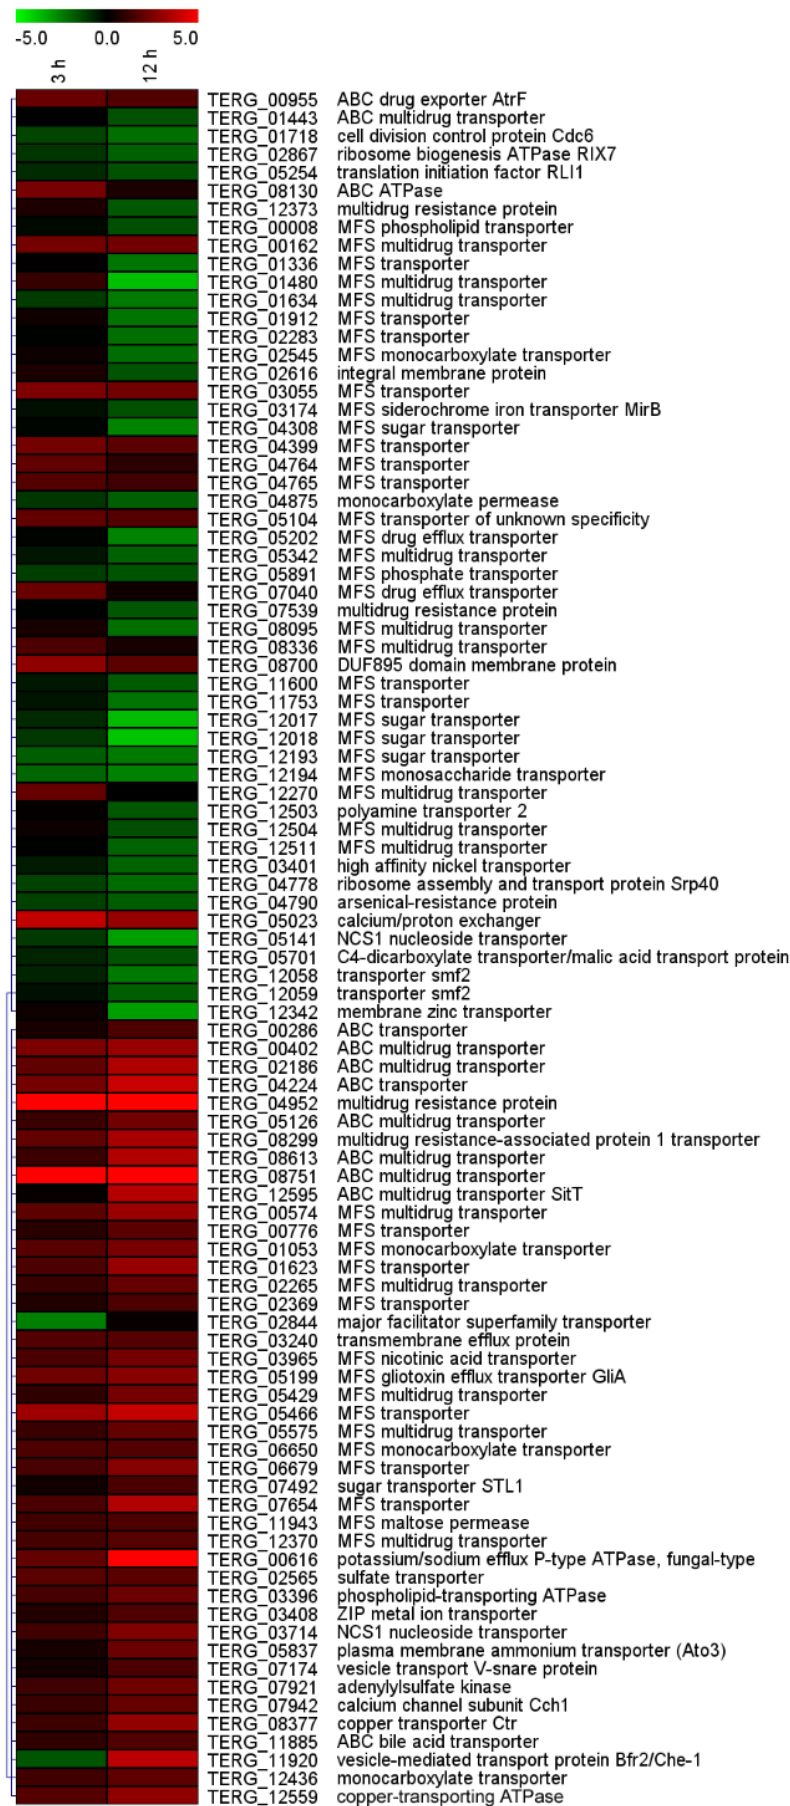

**Figure S3:** *Trichophyton rubrum* membrane transporter genes modulated in response to SRT.

**Table S1:** List of primers used in RT-qPCR assays.

| ID         | Gene Product Name                                                | Primers (5' - 3')                                        | Efficiency (%) |
|------------|------------------------------------------------------------------|----------------------------------------------------------|----------------|
| TERG_05742 | DNA-dependent RNA polymerase II RPB140                           | FW: TGCAGGAGCTGGTGGGAAGA<br>REV: GCTGGGAGGTACTGTTTGATCAA | 94.99          |
| TERG_04402 | glyceraldehyde 3-phosphate dehydrogenase                         | FW: GCGTGACCCAGCCAACA<br>REV: CGGTGGACTCGACGATGTAGT      | 99.90          |
| TERG_11735 | microtubule associated protein ( <i>T. tonsurans</i> )           | FW: GGGCCAAAGAAACAACAACA<br>REV: CGCTCGGCATATTACCCTAA    | 98.2           |
| TERG_07544 | lipase ( <i>T. tonsurans</i> )                                   | FW: CTTGACGGATGGAAAAAGGA<br>REV: CACCGTTATTTGGATCAGCA    | 101.6          |
| TERG_06673 | pachytene checkpoint component Pch2 ( <i>T. tonsurans</i> )      | FW: ATGGGGAGATGCAGTTATGG<br>REV: ACAACGCTCACTTGTGCAAC    | 102.8          |
| TERG_01762 | sulfite reductase (NADPH) hemoprotein. beta-component            | FW: ACGTGGATTCTGGGAAACAG<br>REV: AGGCCGAAAACGGAATACTT    | 95.3           |
| TERG_05522 | lysophospholipase ( <i>T. equinum</i> )                          | FW: CAACGCGGACAATGTCTCTA<br>REV: CTCCATTCATCAAAGCACGA    | 104.0          |
| TERG_11924 | ankyrin repeat protein ( <i>T. tonsurans</i> )                   | FW: GACCGGAAAGGTGGATGTTA<br>REV: CTCGTGTCGATAGCTTGCAG    | 100.0          |
| TERG_06548 | hypothetical protein                                             | FW: ATCCGGTTCACAGACCAAAC<br>REV: GCTGGATTGAAAGGAGGACA    | 102.0          |
| TERG_03936 | CAMK protein kinase                                              | FW: AGACAGCTGGCTTGCAAAAT<br>REV: TGAAACAGTCGTTTGGGACA    | 98.9           |
| TERG_06540 | glutathione transferase ( <i>T. tonsurans</i> )                  | FW: AGGGATTGAACAAAGCCAGA<br>REV: AGGACCAATCTCATCCATCG    | 102.0          |
| TERG_07570 | G-protein signaling regulator. putative ( <i>T. verrucosum</i> ) | FW: TGGCATCAAGCACAAACTGT<br>REV: CTTTTTGGGCTTTGGACTTG    | 103.0          |
| TERG_07539 | multidrug resistance protein ( <i>T. tonsurans</i> )             | FW: CTCCTACCACCCATTGCTA<br>REV: CTCAAGGCCGATAAGGAACA     | 100.0          |
| TERG_03815 | subtilisin-like protease 3                                       | FW: TGGTGTTGACACCGGTATTG<br>REV: GTTGCCATCAGTGTTGTCGT    | 102.0          |

**Table S2:** General features of RNA-seq reads mapped to the *Trichophyton rubrum* reference genome.

| Sample               | Raw reads  | High-quality reads | Mapped reads STAR | Total mapped reads (%) |
|----------------------|------------|--------------------|-------------------|------------------------|
| Control 3 hours I    | 49,001,399 | 46,661,059         | 45,099,456        | 96.65                  |
| Control 3 hours II   | 53,711,149 | 50,929,711         | 48,747,310        | 95.71                  |
| Control 3 hours III  | 54,065,522 | 51,244,460         | 48,776,743        | 95.18                  |
| Control 12 hours I   | 49,723,884 | 47,231,185         | 45,011,034        | 95.30                  |
| Control 12 hours II  | 48,820,202 | 46,313,505         | 38,542,411        | 83.22                  |
| Control 12 hours III | 49,378,560 | 46,733,086         | 38,063,153        | 81.45                  |
| SRT 3 hours I        | 44,238,209 | 41,936,258         | 40,012,345        | 95.41                  |
| SRT 3 hours II       | 46,989,637 | 44,653,620         | 41,137,174        | 92.13                  |
| SRT 3 hours III      | 46,798,013 | 44,244,584         | 42,078,809        | 95.10                  |
| SRT 12 hours I       | 42,267,590 | 40,220,692         | 38,407,036        | 95.49                  |
| SRT 12 hours II      | 43,358,547 | 41,011,155         | 38,955,931        | 94.99                  |
| SRT 12 hours III     | 36,247,455 | 34,371,291         | 32,688,609        | 95.10                  |

**Table S3:** *Trichophyton rubrum* genes modulated in response to SRT exposure at each time point.

| ID         | 3h   | 12h | Gene Product Name                                                             |
|------------|------|-----|-------------------------------------------------------------------------------|
| TERG_00785 | 8.60 |     | endoplasmic reticulum vesicle protein 25                                      |
| TERG_02041 | 4.28 |     | glutathione S-transferase ( <i>T. equinum</i> )                               |
| TERG_12218 | 4.26 |     | hypothetical protein                                                          |
| TERG_11932 | 3.77 |     | hypothetical protein                                                          |
| TERG_11576 | 3.48 |     | hypothetical protein                                                          |
| TERG_11896 | 3.47 |     | aminotransferase ( <i>T. equinum</i> )                                        |
| TERG_06701 | 3.42 |     | gamma-glutamyltransferase                                                     |
| TERG_12400 | 3.42 |     | hypothetical protein                                                          |
| TERG_07781 | 3.36 |     | hypothetical protein                                                          |
| TERG_00578 | 3.10 |     | aspartic endopeptidase (AP1), putative ( <i>T. verrucosum</i> )               |
| TERG_05650 | 2.97 |     | blasticidin-resistance protein ( <i>T. tonsurans</i> )                        |
| TERG_04003 | 2.92 |     | AMP dependent CoA ligase ( <i>T. tonsurans</i> )                              |
| TERG_00911 | 2.85 |     | hypothetical protein                                                          |
| TERG_02517 | 2.84 |     | N-acetyltransferase, GNAT family, putative ( <i>A. benhamiae</i> )            |
| TERG_12606 | 2.78 |     | protease DPPV, putative ( <i>A. benhamiae</i> )                               |
| TERG_05943 | 2.73 |     | aminotransferase, class III ( <i>T. verrucosum</i> )                          |
| TERG_11700 | 2.69 |     | ATP-dependent RNA helicase SUB2 ( <i>T. equinum</i> )                         |
| TERG_06116 | 2.69 |     | indoleamine 2,3-dioxygenase ( <i>T. equinum</i> )                             |
| TERG_12661 | 2.60 |     | hypothetical protein                                                          |
| TERG_00830 | 2.55 |     | cytochrome P450 monooxygenase, putative ( <i>A. benhamiae</i> )               |
| TERG_04022 | 2.53 |     | carboxypeptidase S1, putative ( <i>A. benhamiae</i> )                         |
| TERG_01896 | 2.47 |     | hypothetical protein                                                          |
| TERG_03070 | 2.47 |     | flotillin domain-containing protein ( <i>T. equinum</i> )                     |
| TERG_03489 | 2.46 |     | hypothetical protein                                                          |
| TERG_02990 | 2.42 |     | subtilisin-like protease 6                                                    |
| TERG_06781 | 2.40 |     | metallo-beta-lactamase domain protein, putative ( <i>A. benhamiae</i> )       |
| TERG_05445 | 2.40 |     | DUF323 domain-containing protein ( <i>T. equinum</i> )                        |
| TERG_12173 | 2.36 |     | glycerol-3-phosphate dehydrogenase, mitochondrial                             |
| TERG_08130 | 2.36 |     | ABC ATPase ( <i>T. equinum</i> )                                              |
| TERG_12556 | 2.33 |     | hypothetical protein                                                          |
| TERG_12135 | 2.33 |     | hypothetical protein                                                          |
| TERG_08014 | 2.28 |     | haloacid dehalogenase, type II                                                |
| TERG_00227 | 2.28 |     | glutamine amidotransferase subunit pdxT ( <i>T. equinum</i> )                 |
| TERG_07451 | 2.27 |     | acetoacetate-CoA ligase                                                       |
| TERG_01555 | 2.26 |     | L-serine dehydratase, putative ( <i>T. verrucosum</i> )                       |
| TERG_02615 | 2.24 |     | oxidoreductase, 2OG-Fe(II) oxygenase family, putative ( <i>A. benhamiae</i> ) |
| TERG_01281 | 2.23 |     | malate synthase, glyoxysomal                                                  |
| TERG_00579 | 2.23 |     | glutathione S-transferase ( <i>T. tonsurans</i> )                             |
| TERG_03490 | 2.22 |     | hypothetical protein                                                          |
| TERG_07655 | 2.20 |     | FAD dependent oxidoreductase, putative ( <i>T. verrucosum</i> )               |
| TERG_02360 | 2.19 |     | hypothetical protein                                                          |
| TERG_01511 | 2.19 |     | hypothetical protein                                                          |
| TERG_07782 | 2.19 |     | GA-binding protein beta chain ( <i>M. gypseum</i> )                           |
| TERG_08240 | 2.18 |     | methyltransferase, putative ( <i>T. verrucosum</i> )                          |
| TERG_11757 | 2.17 |     | hypothetical protein                                                          |
| TERG_02803 | 2.15 |     | 3-oxoacyl-(acyl-carrier-protein) reductase ( <i>T. verrucosum</i> )           |

|            |      |                                                                          |
|------------|------|--------------------------------------------------------------------------|
| TERG_01762 | 2.14 | sulfite reductase (NADPH) hemoprotein, beta-component                    |
| TERG_08444 | 2.09 | CipC protein ( <i>M. canis</i> )                                         |
| TERG_07980 | 2.09 | hypothetical protein                                                     |
| TERG_05121 | 2.09 | cytochrome P450 monooxygenase, putative ( <i>A. benhamiae</i> )          |
| TERG_04324 | 2.08 | extracellular metalloproteinase 4                                        |
| TERG_07040 | 2.07 | MFS drug efflux transporter ( <i>T. equinum</i> )                        |
| TERG_08757 | 2.06 | hypothetical protein                                                     |
| TERG_07673 | 2.04 | hypothetical protein                                                     |
| TERG_05347 | 2.03 | epoxide hydrolase, putative ( <i>T. verrucosum</i> )                     |
| TERG_08466 | 2.03 | hypothetical protein                                                     |
| TERG_07001 | 2.03 | hydroxyisocaproate dehydrogenase ( <i>T. tonsurans</i> )                 |
| TERG_07544 | 2.02 | lipase ( <i>T. tonsurans</i> )                                           |
| TERG_06673 | 2.00 | pachytene checkpoint component Pch2 ( <i>T. tonsurans</i> )              |
| TERG_04448 | 1.97 | CMGC/DYRK protein kinase ( <i>M. gypseum</i> )                           |
| TERG_01463 | 1.97 | cytochrome c peroxidase ( <i>T. tonsurans</i> )                          |
| TERG_08151 | 1.96 | GNAT family acetyltransferase, putative ( <i>T. verrucosum</i> )         |
| TERG_00614 | 1.96 | dihydrodipicolinate synthetase ( <i>T. tonsurans</i> )                   |
| TERG_07031 | 1.95 | hypothetical protein                                                     |
| TERG_11539 | 1.95 | 3-oxoacyl-(acyl-carrier-protein) reductase ( <i>T. tonsurans</i> )       |
| TERG_00887 | 1.95 | high expression lethality protein Hel10 ( <i>T. tonsurans</i> )          |
| TERG_04164 | 1.94 | hypothetical protein                                                     |
| TERG_04764 | 1.93 | MFS transporter ( <i>T. tonsurans</i> )                                  |
| TERG_06506 | 1.91 | hypothetical protein                                                     |
| TERG_05677 | 1.91 | phenazine biosynthesis protein ( <i>T. equinum</i> )                     |
| TERG_12483 | 1.90 | nonribosomal brevianamide peptide synthase FtmA ( <i>T. verrucosum</i> ) |
| TERG_00563 | 1.90 | GNAT family N-acetyltransferase, putative ( <i>A. benhamiae</i> )        |
| TERG_04098 | 1.88 | Swi5 domain-containing protein ( <i>T. equinum</i> )                     |
| TERG_03855 | 1.88 | WW domain-containing protein ( <i>M. canis</i> )                         |
| TERG_02196 | 1.87 | l-allo-threonine aldolase ( <i>T. tonsurans</i> )                        |
| TERG_04021 | 1.87 | GNAT family acetyltransferase, putative ( <i>A. benhamiae</i> )          |
| TERG_01270 | 1.87 | AMP dependent ligase ( <i>T. tonsurans</i> )                             |
| TERG_00413 | 1.86 | DSBA oxidoreductase ( <i>T. equinum</i> )                                |
| TERG_03886 | 1.84 | proline permease, putative ( <i>T. verrucosum</i> )                      |
| TERG_06806 | 1.82 | hypothetical protein                                                     |
| TERG_12285 | 1.82 | hypothetical protein                                                     |
| TERG_12581 | 1.82 | hypothetical protein                                                     |
| TERG_07911 | 1.82 | hypothetical protein                                                     |
| TERG_05357 | 1.81 | succinate:fumarate antiporter ( <i>T. tonsurans</i> )                    |
| TERG_01937 | 1.80 | short chain dehydrogenase ( <i>T. tonsurans</i> )                        |
| TERG_07327 | 1.80 | pyridoxamine phosphate oxidase ( <i>T. tonsurans</i> )                   |
| TERG_01445 | 1.79 | hypothetical protein                                                     |
| TERG_11776 | 1.78 | hypothetical protein                                                     |
| TERG_01088 | 1.78 | 3,4-dihydroxy-2-butanone-4-phosphate synthase                            |
| TERG_07734 | 1.78 | O-methyltransferase, putative ( <i>T. verrucosum</i> )                   |
| TERG_05641 | 1.78 | amino acid permease (Can1), putative ( <i>T. verrucosum</i> )            |
| TERG_00875 | 1.76 | glutamate-cysteine ligase                                                |
| TERG_05077 | 1.76 | D-amino-acid oxidase ( <i>T. equinum</i> )                               |
| TERG_05528 | 1.76 | hypothetical protein                                                     |
| TERG_07267 | 1.75 | hypothetical protein                                                     |

|            |      |                                                                                                 |
|------------|------|-------------------------------------------------------------------------------------------------|
| TERG_05545 | 1.75 | GNAT family acetyltransferase, putative ( <i>A. benhamiae</i> )                                 |
| TERG_03791 | 1.74 | NADH-ubiquinone oxidoreductase 20 kDa subunit ( <i>T. equinum</i> )                             |
| TERG_11800 | 1.74 | serine/threonine protein kinase ( <i>T. equinum</i> )                                           |
| TERG_01805 | 1.73 | mucin ( <i>M. canis</i> )                                                                       |
| TERG_05484 | 1.73 | acyl-CoA dehydrogenase ( <i>T. tonsurans</i> )                                                  |
| TERG_04124 | 1.73 | hypothetical protein                                                                            |
| TERG_12248 | 1.72 | transcription factor fet5 ( <i>M. gypseum</i> )                                                 |
| TERG_00535 | 1.72 | calcium-translocating P-type ATPase, PMCA-type                                                  |
| TERG_02837 | 1.71 | 3-beta hydroxysteroid dehydrogenase/isomerase family protein, putative ( <i>T. verrucosum</i> ) |
| TERG_00073 | 1.71 | NADH-dependent flavin oxidoreductase, putative ( <i>T. verrucosum</i> )                         |
| TERG_12005 | 1.71 | hypothetical protein                                                                            |
| TERG_12647 | 1.70 | hypothetical protein                                                                            |
| TERG_04765 | 1.70 | MFS transporter, putative ( <i>A. benhamiae</i> )                                               |
| TERG_08614 | 1.69 | hypothetical protein                                                                            |
| TERG_06206 | 1.69 | peptide-methionine (S)-S-oxide reductase                                                        |
| TERG_01330 | 1.66 | GPI anchored protein, putative ( <i>A. benhamiae</i> )                                          |
| TERG_11538 | 1.66 | 3-oxoacyl-(acyl-carrier-protein) reductase ( <i>T. tonsurans</i> )                              |
| TERG_08058 | 1.66 | alpha-1,2-mannosidase family protein ( <i>T. verrucosum</i> )                                   |
| TERG_12250 | 1.66 | hypothetical protein                                                                            |
| TERG_01949 | 1.65 | hypothetical protein                                                                            |
| TERG_12295 | 1.65 | hypothetical protein                                                                            |
| TERG_01364 | 1.65 | hypothetical protein                                                                            |
| TERG_03893 | 1.64 | C6 transcription factor, putative ( <i>A. benhamiae</i> )                                       |
| TERG_02214 | 1.64 | carboxypeptidase 2                                                                              |
| TERG_02249 | 1.63 | phenylacetyl-CoA ligase ( <i>T. tonsurans</i> )                                                 |
| TERG_02746 | 1.63 | hypothetical protein                                                                            |
| TERG_08405 | 1.63 | leucine aminopeptidase 2                                                                        |
| TERG_01429 | 1.63 | hypothetical protein                                                                            |
| TERG_05259 | 1.62 | cytochrome P450, putative ( <i>A. benhamiae</i> )                                               |
| TERG_01733 | 1.60 | alcohol dehydrogenase, putative ( <i>T. verrucosum</i> )                                        |
| TERG_08045 | 1.60 | DUF455 domain-containing protein ( <i>T. equinum</i> )                                          |
| TERG_01436 | 1.60 | oxidoreductase ( <i>T. equinum</i> )                                                            |
| TERG_02798 | 1.59 | DUF895 domain membrane protein ( <i>T. equinum</i> )                                            |
| TERG_01652 | 1.59 | Atg10p ( <i>M. gypseum</i> )                                                                    |
| TERG_00953 | 1.58 | OefC protein ( <i>T. equinum</i> )                                                              |
| TERG_05305 | 1.58 | glutathione-dependent formaldehyde-activating enzyme ( <i>T. tonsurans</i> )                    |
| TERG_05714 | 1.57 | hypothetical protein                                                                            |
| TERG_05735 | 1.57 | dipeptidyl peptidase 4                                                                          |
| TERG_07282 | 1.56 | cytochrome P450 monooxygenase, putative ( <i>T. verrucosum</i> )                                |
| TERG_02179 | 1.56 | keylime pathogenicity protein ( <i>M. canis</i> )                                               |
| TERG_08438 | 1.56 | hypothetical protein                                                                            |
| TERG_00070 | 1.56 | maleylacetoacetate isomerase                                                                    |
| TERG_08222 | 1.55 | hypothetical protein                                                                            |
| TERG_05522 | 1.55 | lysophospholipase ( <i>T. equinum</i> )                                                         |
| TERG_05409 | 1.55 | FAD dependent oxidoreductase ( <i>T. equinum</i> )                                              |
| TERG_03422 | 1.54 | hypothetical protein                                                                            |
| TERG_04447 | 1.54 | protein kinase subdomain-containing protein ( <i>T. equinum</i> )                               |
| TERG_04948 | 1.53 | hypothetical protein                                                                            |



|            |       |                                                                                    |
|------------|-------|------------------------------------------------------------------------------------|
| TERG_02773 | 1.53  | tartrate dehydrogenase                                                             |
| TERG_02725 | 1.53  | hypothetical protein                                                               |
| TERG_08336 | 1.53  | MFS multidrug transporter, putative ( <i>A. benhamiae</i> )                        |
| TERG_06296 | 1.53  | hypothetical protein                                                               |
| TERG_06761 | 1.53  | CAMK protein kinase ( <i>T. tonsurans</i> )                                        |
| TERG_06047 | 1.52  | hypothetical protein                                                               |
| TERG_08208 | 1.52  | glutathione S-transferase ( <i>T. verrucosum</i> )                                 |
| TERG_00506 | 1.52  | hypothetical protein                                                               |
| TERG_11639 | 1.51  | isocitrate lyase                                                                   |
| TERG_01732 | 1.51  | amidohydrolase ( <i>T. equinum</i> )                                               |
| TERG_00487 | 1.50  | hypothetical protein                                                               |
| TERG_12454 | 1.50  | cutinase, putative ( <i>A. benhamiae</i> )                                         |
| TERG_08528 | -1.51 | fatty acid synthase beta subunit dehydratase ( <i>T. tonsurans</i> )               |
| TERG_00129 | -1.56 | hypothetical protein                                                               |
| TERG_08633 | -1.59 | hypothetical protein                                                               |
| TERG_05965 | -1.60 | hypothetical protein                                                               |
| TERG_08038 | -1.83 | polysaccharide deacetylase family protein ( <i>T. equinum</i> )                    |
| TERG_07598 | -1.84 | serine carboxypeptidase ( <i>T. equinum</i> )                                      |
| TERG_02646 | -1.96 | hypothetical protein                                                               |
| TERG_02952 | -2.05 | oxidoreductase, short chain dehydrogenase/reductase family ( <i>A. benhamiae</i> ) |
| TERG_12514 | -2.40 | hypothetical protein                                                               |
| TERG_01347 | -2.42 | TIGR01456 family HAD hydrolase                                                     |
| TERG_11735 | -2.50 | microtubule associated protein ( <i>T. tonsurans</i> )                             |
| TERG_02650 | -3.56 | NmrA family protein ( <i>T. equinum</i> )                                          |
| TERG_04066 | -4.67 | filamentation protein (Rhfl), putative ( <i>T. verrucosum</i> )                    |
| TERG_02652 | -4.91 | O-methyltransferase, putative ( <i>T. verrucosum</i> )                             |

Gene expression values are expressed in log<sub>2</sub> fold change.

| ID         | 3h | 12h  | Gene Product Name                                                                |
|------------|----|------|----------------------------------------------------------------------------------|
| TERG_07028 |    | 6.08 | hypothetical protein                                                             |
| TERG_12356 |    | 4.89 | hypothetical protein                                                             |
| TERG_04373 |    | 4.52 | hypothetical protein                                                             |
| TERG_06992 |    | 4.36 | pyridine nucleotide-disulphide oxidoreductase ( <i>T. tonsurans</i> )            |
| TERG_03254 |    | 4.22 | hypothetical protein                                                             |
| TERG_01717 |    | 4.13 | RTA1 domain protein, putative ( <i>A. benhamiae</i> )                            |
| TERG_12014 |    | 3.99 | hypothetical protein                                                             |
| TERG_06772 |    | 3.88 | hypothetical protein                                                             |
| TERG_03252 |    | 3.85 | hypothetical protein                                                             |
| TERG_11924 |    | 3.85 | ankyrin repeat protein ( <i>T. tonsurans</i> )                                   |
| TERG_03293 |    | 3.83 | hypothetical protein                                                             |
| TERG_12197 |    | 3.72 | tyrosyl-DNA phosphodiesterase ( <i>T. tonsurans</i> )                            |
| TERG_11920 |    | 3.68 | vesicle-mediated transport protein Bfr2/Che-1, putative ( <i>T. verrucosum</i> ) |
| TERG_05823 |    | 3.67 | integral membrane protein ( <i>A. benhamiae</i> )                                |
| TERG_06769 |    | 3.64 | hypothetical protein                                                             |
| TERG_06839 |    | 3.60 | extracellular proline-rich protein ( <i>T. verrucosum</i> )                      |
| TERG_04183 |    | 3.59 | yqcI protein ( <i>T. equinum</i> )                                               |
| TERG_08613 |    | 3.50 | ABC multidrug transporter, putative ( <i>A. benhamiae</i> )                      |

|            |                                                                                           |
|------------|-------------------------------------------------------------------------------------------|
| TERG_07654 | 3.48 MFS transporter, putative ( <i>T. verrucosum</i> )                                   |
| TERG_01154 | 3.40 RTA1 domain protein, putative ( <i>T. verrucosum</i> )                               |
| TERG_03712 | 3.39 hydantoinase ( <i>T. equinum</i> )                                                   |
| TERG_08049 | 3.38 cation diffusion facilitator, putative ( <i>T. verrucosum</i> )                      |
| TERG_03552 | 3.36 serine carboxypeptidase ( <i>T. tonsurans</i> )                                      |
| TERG_05428 | 3.34 hypothetical protein                                                                 |
| TERG_08508 | 3.28 hypothetical protein                                                                 |
| TERG_01394 | 3.27 cytochrome P450 alkane hydroxylase, putative ( <i>T. verrucosum</i> )                |
| TERG_03251 | 3.19 hypothetical protein                                                                 |
| TERG_02830 | 3.19 hypothetical protein                                                                 |
| TERG_06167 | 3.16 hypothetical protein                                                                 |
| TERG_07133 | 3.16 hypothetical protein                                                                 |
| TERG_06770 | 3.16 cytochrome P450, putative ( <i>T. verrucosum</i> )                                   |
| TERG_00801 | 3.11 hypothetical protein                                                                 |
| TERG_06189 | 3.04 endo-1,3(4)-beta-glucanase, putative ( <i>T. verrucosum</i> )                        |
| TERG_08347 | 2.99 cytochrome P450 monooxygenase, putative ( <i>A. benhamiae</i> )                      |
| TERG_04600 | 2.96 fungal specific transcription factor domain-containing protein ( <i>T. equinum</i> ) |
| TERG_12118 | 2.96 hypothetical protein                                                                 |
| TERG_08801 | 2.94 hypothetical protein                                                                 |
| TERG_08377 | 2.92 copper transporter Ctr ( <i>T. tonsurans</i> )                                       |
| TERG_11817 | 2.91 transcription initiation factor TFIID subunit 7, putative ( <i>T. verrucosum</i> )   |
| TERG_01678 | 2.90 histone-lysine N-methyltransferase ( <i>T. tonsurans</i> )                           |
| TERG_04714 | 2.89 mitochondrial phosphate carrier protein ( <i>T. tonsurans</i> )                      |
| TERG_00917 | 2.89 aureobasidin A resistance protein ( <i>T. equinum</i> )                              |
| TERG_02306 | 2.86 integral membrane protein ( <i>T. equinum</i> )                                      |
| TERG_03491 | 2.81 hypothetical protein                                                                 |
| TERG_11513 | 2.79 esterase ( <i>T. equinum</i> )                                                       |
| TERG_11774 | 2.77 hypothetical protein                                                                 |
| TERG_12718 | 2.77 hypothetical protein                                                                 |
| TERG_04109 | 2.74 C3HC4 finger protein ( <i>A. benhamiae</i> )                                         |
| TERG_00149 | 2.72 hypothetical protein                                                                 |
| TERG_12070 | 2.72 hypothetical protein                                                                 |
| TERG_03183 | 2.71 hypothetical protein                                                                 |
| TERG_01970 | 2.70 hypothetical protein                                                                 |
| TERG_02150 | 2.67 hypothetical protein                                                                 |
| TERG_06679 | 2.64 MFS transporter, putative ( <i>A. benhamiae</i> )                                    |
| TERG_12068 | 2.63 PLC-E ( <i>T. equinum</i> )                                                          |
| TERG_12237 | 2.63 hypothetical protein                                                                 |
| TERG_12679 | 2.62 JmjC domain-containing protein ( <i>T. tonsurans</i> )                               |
| TERG_05618 | 2.61 Lcc2 ( <i>T. equinum</i> )                                                           |
| TERG_02213 | 2.60 extracellular metalloproteinase 1                                                    |
| TERG_07919 | 2.59 thioesterase family protein ( <i>T. verrucosum</i> )                                 |
| TERG_07982 | 2.59 hypothetical protein                                                                 |
| TERG_08855 | 2.58 hypothetical protein                                                                 |
| TERG_03868 | 2.56 cupin domain-containing protein ( <i>T. tonsurans</i> )                              |
| TERG_00527 | 2.55 hypothetical protein                                                                 |
| TERG_03714 | 2.53 NCS1 nucleoside transporter ( <i>T. tonsurans</i> )                                  |
| TERG_12028 | 2.53 metallothionein family protein ( <i>T. equinum</i> )                                 |
| TERG_05298 | 2.53 rhomboid family membrane protein ( <i>T. tonsurans</i> )                             |

|            |      |                                                                                       |
|------------|------|---------------------------------------------------------------------------------------|
| TERG_04721 | 2.52 | glutamate carboxypeptidase ( <i>T. equinum</i> )                                      |
| TERG_01694 | 2.51 | ankyrin repeat-containing protein ( <i>T. equinum</i> )                               |
| TERG_01807 | 2.51 | hypothetical protein                                                                  |
| TERG_11537 | 2.49 | hypothetical protein                                                                  |
| TERG_05988 | 2.49 | solid-state culture expressed protein (Aos23), putative ( <i>T. verrucosum</i> )      |
| TERG_04939 | 2.47 | hypothetical protein                                                                  |
| TERG_11514 | 2.47 | lipase/esterase, putative ( <i>T. verrucosum</i> )                                    |
| TERG_07331 | 2.45 | integral membrane protein ( <i>T. tonsurans</i> )                                     |
| TERG_12522 | 2.45 | 4-hydroxyphenylpyruvate dioxygenase ( <i>T. tonsurans</i> )                           |
| TERG_06290 | 2.44 | hypothetical protein                                                                  |
| TERG_08230 | 2.44 | hypothetical protein                                                                  |
| TERG_03132 | 2.43 | hypothetical protein                                                                  |
| TERG_03830 | 2.43 | hypothetical protein                                                                  |
| TERG_07479 | 2.41 | hypothetical protein                                                                  |
| TERG_01225 | 2.40 | GTPase-activating protein GYP7 ( <i>T. equinum</i> )                                  |
| TERG_11517 | 2.40 | hypothetical protein                                                                  |
| TERG_12639 | 2.39 | choriogenin Hminor ( <i>M. canis</i> )                                                |
| TERG_06807 | 2.39 | cutinase, putative ( <i>A. benhamiae</i> )                                            |
| TERG_02562 | 2.38 | chitin synthase C                                                                     |
| TERG_07242 | 2.37 | di-trans,poly-cis-decaprenylcistransferase                                            |
| TERG_03722 | 2.37 | hypothetical protein                                                                  |
| TERG_02448 | 2.36 | hypothetical protein                                                                  |
| TERG_05032 | 2.36 | C6 transcription factor ( <i>T. equinum</i> )                                         |
| TERG_01265 | 2.36 | HhH-GPD family base excision DNA repair protein ( <i>T. tonsurans</i> )               |
| TERG_03329 | 2.36 | hypothetical protein                                                                  |
| TERG_03218 | 2.35 | extracellular salicylate hydroxylase/monooxygenase, putative ( <i>T. verrucosum</i> ) |
| TERG_03732 | 2.35 | hypothetical protein                                                                  |
| TERG_03570 | 2.34 | mitochondria fission 1 protein                                                        |
| TERG_00638 | 2.34 | cellobiose dehydrogenase, putative ( <i>A. benhamiae</i> )                            |
| TERG_05429 | 2.33 | MFS multidrug transporter, putative ( <i>T. verrucosum</i> )                          |
| TERG_03415 | 2.33 | serine/threonine protein kinase                                                       |
| TERG_12692 | 2.33 | hypothetical protein                                                                  |
| TERG_02757 | 2.33 | NADP-dependent alcohol dehydrogenase ( <i>T. equinum</i> )                            |
| TERG_08922 | 2.32 | hypothetical protein                                                                  |
| TERG_05013 | 2.32 | stress response RCI peptide ( <i>T. equinum</i> )                                     |
| TERG_03965 | 2.31 | MFS nicotinic acid transporter ( <i>T. tonsurans</i> )                                |
| TERG_12337 | 2.30 | hypothetical protein                                                                  |
| TERG_03628 | 2.30 | serine/threonine protein kinase ( <i>T. tonsurans</i> )                               |
| TERG_07705 | 2.30 | hypothetical protein                                                                  |
| TERG_00620 | 2.30 | NAD <sup>+</sup> kinase Utr1 ( <i>T. equinum</i> )                                    |
| TERG_00847 | 2.30 | SOH1 family protein ( <i>T. equinum</i> )                                             |
| TERG_00959 | 2.30 | RNA binding protein, putative ( <i>A. benhamiae</i> )                                 |
| TERG_05135 | 2.30 | glutathione S-transferase GliG ( <i>A. benhamiae</i> )                                |
| TERG_08686 | 2.29 | hypothetical protein                                                                  |
| TERG_00950 | 2.29 | hypothetical protein                                                                  |
| TERG_07273 | 2.29 | glycerol kinase ( <i>T. equinum</i> )                                                 |
| TERG_08622 | 2.28 | transferase ( <i>M. canis</i> )                                                       |
| TERG_06402 | 2.28 | Ser/Thr protein phosphatase family protein ( <i>T. verrucosum</i> )                   |
| TERG_05239 | 2.28 | DNA polymerase POL4, putative ( <i>T. verrucosum</i> )                                |

|            |                                                                                      |
|------------|--------------------------------------------------------------------------------------|
| TERG_07311 | 2.28 fibronectin type III domain-containing protein ( <i>T. equinum</i> )            |
| TERG_05126 | 2.27 ABC multidrug transporter, putative ( <i>A. benhamiae</i> )                     |
| TERG_03511 | 2.27 calcineurin binding protein ( <i>T. equinum</i> )                               |
| TERG_05310 | 2.27 kynurenine 3-monooxygenase ( <i>T. tonsurans</i> )                              |
| TERG_07804 | 2.26 PBSP domain-containing protein ( <i>T. tonsurans</i> )                          |
| TERG_12045 | 2.26 hypothetical protein                                                            |
| TERG_05244 | 2.26 hypothetical protein                                                            |
| TERG_05349 | 2.26 oxidoreductase, 2OG-Fe(II) oxygenase family, putative ( <i>A. benhamiae</i> )   |
| TERG_05680 | 2.26 IBR domain containing protein ( <i>T. equinum</i> )                             |
| TERG_06900 | 2.25 hypothetical protein                                                            |
| TERG_00471 | 2.25 hypothetical protein                                                            |
| TERG_12694 | 2.24 hypothetical protein                                                            |
| TERG_01171 | 2.24 autophagy regulatory protein Atg2, putative ( <i>T. verrucosum</i> )            |
| TERG_03662 | 2.23 hypothetical protein                                                            |
| TERG_03620 | 2.23 glycosyl transferase ( <i>T. tonsurans</i> )                                    |
| TERG_11831 | 2.22 hypothetical protein                                                            |
| TERG_11543 | 2.22 hypothetical protein                                                            |
| TERG_01346 | 2.22 lipase/serine esterase ( <i>T. tonsurans</i> )                                  |
| TERG_06994 | 2.22 hypothetical protein                                                            |
| TERG_00416 | 2.22 phenylacetaldoxime dehydratase family protein, putative ( <i>A. benhamiae</i> ) |
| TERG_03512 | 2.21 hypothetical protein                                                            |
| TERG_07987 | 2.21 GNAT family acetyltransferase ( <i>T. equinum</i> )                             |
| TERG_00410 | 2.21 hypothetical protein                                                            |
| TERG_01822 | 2.21 serine/threonine protein kinase                                                 |
| TERG_06766 | 2.20 high affinity methionine permease ( <i>T. tonsurans</i> )                       |
| TERG_06995 | 2.19 metalloredutase, putative ( <i>T. verrucosum</i> )                              |
| TERG_08278 | 2.19 serine/threonine protein kinase ( <i>T. tonsurans</i> )                         |
| TERG_07501 | 2.19 nitrate reductase ( <i>T. tonsurans</i> )                                       |
| TERG_12243 | 2.18 hypothetical protein                                                            |
| TERG_02558 | 2.18 oxysterol binding protein ( <i>T. tonsurans</i> )                               |
| TERG_07891 | 2.18 DUF255 domain-containing protein ( <i>T. equinum</i> )                          |
| TERG_07921 | 2.18 adenylylsulfate kinase                                                          |
| TERG_03064 | 2.17 MCAK-like kinesin ( <i>T. equinum</i> )                                         |
| TERG_06969 | 2.17 CMGC/CDK/CDK5 protein kinase                                                    |
| TERG_12722 | 2.17 transferase ( <i>M. canis</i> )                                                 |
| TERG_03177 | 2.17 RING finger domain protein, putative ( <i>A. benhamiae</i> )                    |
| TERG_01849 | 2.17 hypothetical protein                                                            |
| TERG_02469 | 2.15 hypothetical protein                                                            |
| TERG_11680 | 2.15 DEAD/DEAH box DNA helicase ( <i>T. tonsurans</i> )                              |
| TERG_08065 | 2.14 auxin Efflux Carrier superfamily protein ( <i>T. equinum</i> )                  |
| TERG_03763 | 2.14 AAA family ATPase ( <i>T. tonsurans</i> )                                       |
| TERG_05837 | 2.12 plasma membrane ammonium transporter (Ato3), putative ( <i>A. benhamiae</i> )   |
| TERG_05541 | 2.12 hypothetical protein                                                            |
| TERG_02340 | 2.11 polysaccharide deacetylase ( <i>T. equinum</i> )                                |
| TERG_06741 | 2.11 ubiquitin C-terminal hydrolase ( <i>T. tonsurans</i> )                          |
| TERG_03790 | 2.11 DUF1275 domain-containing protein ( <i>T. equinum</i> )                         |
| TERG_03396 | 2.11 phospholipid-transporting ATPase ( <i>T. equinum</i> )                          |
| TERG_04473 | 2.11 hypothetical protein                                                            |
| TERG_03367 | 2.11 hypothetical protein                                                            |

|            |                                                                                   |
|------------|-----------------------------------------------------------------------------------|
| TERG_03443 | 2.10 ankyrin repeat protein ( <i>T. equinum</i> )                                 |
| TERG_04698 | 2.10 hypothetical protein                                                         |
| TERG_12711 | 2.10 hypothetical protein                                                         |
| TERG_01626 | 2.09 AT hook domain-containing protein family protein ( <i>T. equinum</i> )       |
| TERG_11681 | 2.09 DEAD/DEAH box DNA helicase ( <i>T. tonsurans</i> )                           |
| TERG_02092 | 2.09 hypothetical protein                                                         |
| TERG_11764 | 2.09 proline-threonine-rich repeat protein ( <i>T. tonsurans</i> )                |
| TERG_02609 | 2.08 actin patches distal protein 1 ( <i>T. equinum</i> )                         |
| TERG_12721 | 2.08 transferase ( <i>M. canis</i> )                                              |
| TERG_05706 | 2.08 hypothetical protein                                                         |
| TERG_04941 | 2.08 mitochondrial pyruvate dehydrogenase kinase ( <i>T. tonsurans</i> )          |
| TERG_12455 | 2.08 hypothetical protein                                                         |
| TERG_04283 | 2.07 hypothetical protein                                                         |
| TERG_03537 | 2.07 alpha/beta hydrolase ( <i>T. equinum</i> )                                   |
| TERG_07252 | 2.07 hypothetical protein                                                         |
| TERG_05736 | 2.07 alkaline serine protease ( <i>T. tonsurans</i> )                             |
| TERG_08301 | 2.07 fatty-acid synthase subunit alpha ( <i>M. canis</i> )                        |
| TERG_00273 | 2.07 mucin ( <i>M. canis</i> )                                                    |
| TERG_00188 | 2.06 hypothetical protein                                                         |
| TERG_08538 | 2.06 Diacylglycerol kinase domain-containing protein ( <i>T. equinum</i> )        |
| TERG_08262 | 2.06 C6 transcription factor, putative ( <i>A. benhamiae</i> )                    |
| TERG_02651 | 2.05 NRPS-like enzyme, putative ( <i>A. benhamiae</i> )                           |
| TERG_11941 | 2.05 MCAK-like kinesin ( <i>T. equinum</i> )                                      |
| TERG_08666 | 2.05 hypothetical protein                                                         |
| TERG_05111 | 2.05 hypothetical protein                                                         |
| TERG_03125 | 2.05 hypothetical protein                                                         |
| TERG_02113 | 2.04 TIGR01456 family HAD hydrolase                                               |
| TERG_01794 | 2.04 C6 zinc finger domain-containing protein ( <i>M. canis</i> )                 |
| TERG_03681 | 2.04 leucine aminopeptidase ( <i>T. equinum</i> )                                 |
| TERG_07779 | 2.03 LCCL domain-containing protein ( <i>T. tonsurans</i> )                       |
| TERG_05876 | 2.03 hypothetical protein                                                         |
| TERG_03861 | 2.03 C2H2 transcription factor ( <i>T. tonsurans</i> )                            |
| TERG_02018 | 2.02 hypothetical protein                                                         |
| TERG_05425 | 2.02 guanine deaminase                                                            |
| TERG_02315 | 2.02 extracellular aspartic endopeptidase, putative ( <i>A. benhamiae</i> )       |
| TERG_05441 | 2.02 cytochrome P450 alkane hydroxylase, putative ( <i>T. verrucosum</i> )        |
| TERG_05157 | 2.02 hypothetical protein                                                         |
| TERG_02265 | 2.02 MFS multidrug transporter ( <i>T. equinum</i> )                              |
| TERG_08384 | 2.02 hypothetical protein                                                         |
| TERG_06145 | 2.02 arrestin ( <i>T. equinum</i> )                                               |
| TERG_12615 | 2.01 ankyrin repeat-containing protein ( <i>T. equinum</i> )                      |
| TERG_06735 | 2.01 oxysterol binding protein ( <i>T. tonsurans</i> )                            |
| TERG_06778 | 2.01 PAP2 domain protein ( <i>T. verrucosum</i> )                                 |
| TERG_00362 | 2.01 glutaminase ( <i>T. equinum</i> )                                            |
| TERG_07942 | 2.01 calcium channel subunit Cch1 ( <i>T. tonsurans</i> )                         |
| TERG_07990 | 2.00 proline-rich protein ( <i>T. tonsurans</i> )                                 |
| TERG_02974 | 2.00 hypothetical protein                                                         |
| TERG_06457 | 2.00 hypothetical protein                                                         |
| TERG_12588 | 2.00 spindle pole body associated protein SnaD, putative ( <i>T. verrucosum</i> ) |

|            |      |                                                                            |
|------------|------|----------------------------------------------------------------------------|
| TERG_03061 | 2.00 | hypothetical protein                                                       |
| TERG_04268 | 2.00 | cell wall glucanase, putative ( <i>A. benhamiae</i> )                      |
| TERG_02483 | 1.99 | hypothetical protein                                                       |
| TERG_08317 | 1.99 | hypothetical protein                                                       |
| TERG_02371 | 1.99 | hypothetical protein                                                       |
| TERG_05422 | 1.98 | hypothetical protein                                                       |
| TERG_02298 | 1.98 | GPI anchored cell wall protein, putative ( <i>T. verrucosum</i> )          |
| TERG_02902 | 1.98 | hypothetical protein                                                       |
| TERG_05575 | 1.98 | MFS multidrug transporter ( <i>T. tonsurans</i> )                          |
| TERG_06955 | 1.97 | hypothetical protein                                                       |
| TERG_03854 | 1.97 | laccase ( <i>T. tonsurans</i> )                                            |
| TERG_07983 | 1.96 | hypothetical protein                                                       |
| TERG_03121 | 1.96 | DNA repair and recombination protein RAD26 ( <i>M. canis</i> )             |
| TERG_05563 | 1.95 | hypothetical protein                                                       |
| TERG_03857 | 1.95 | phosphotransferase enzyme family protein ( <i>T. equinum</i> )             |
| TERG_05079 | 1.95 | extracellular OTU-like cysteine protease, putative ( <i>A. benhamiae</i> ) |
| TERG_03848 | 1.95 | hypothetical protein                                                       |
| TERG_12072 | 1.93 | hypothetical protein                                                       |
| TERG_03969 | 1.93 | hypothetical protein                                                       |
| TERG_04376 | 1.93 | aldehyde reductase I (ARI), putative ( <i>T. verrucosum</i> )              |
| TERG_07871 | 1.93 | hypothetical protein                                                       |
| TERG_12616 | 1.92 | ankyrin repeat-containing protein ( <i>T. equinum</i> )                    |
| TERG_00995 | 1.92 | hypothetical protein                                                       |
| TERG_04785 | 1.92 | hypothetical protein                                                       |
| TERG_07870 | 1.92 | glycosyl transferase, putative ( <i>A. benhamiae</i> )                     |
| TERG_02183 | 1.92 | C2H2 finger domain-containing protein ( <i>T. equinum</i> )                |
| TERG_02885 | 1.91 | E3 ubiquitin-protein ligase pub1 ( <i>T. tonsurans</i> )                   |
| TERG_00828 | 1.90 | hypothetical protein                                                       |
| TERG_00233 | 1.90 | glyoxalase ( <i>T. tonsurans</i> )                                         |
| TERG_05553 | 1.90 | integral membrane protein ( <i>T. equinum</i> )                            |
| TERG_05446 | 1.90 | sarcosine oxidase ( <i>T. equinum</i> )                                    |
| TERG_08341 | 1.90 | hypothetical protein                                                       |
| TERG_07991 | 1.89 | proline-rich protein ( <i>T. tonsurans</i> )                               |
| TERG_01695 | 1.89 | hypothetical protein                                                       |
| TERG_02061 | 1.89 | C2H2 transcription factor (Ace1), putative ( <i>T. verrucosum</i> )        |
| TERG_08328 | 1.89 | basic proline-rich protein ( <i>M. canis</i> )                             |
| TERG_00176 | 1.88 | hydroxyisourate hydrolase                                                  |
| TERG_03549 | 1.88 | hypothetical protein                                                       |
| TERG_12436 | 1.88 | monocarboxylate transporter ( <i>M. canis</i> )                            |
| TERG_02211 | 1.88 | serine/threonine protein kinase ( <i>T. tonsurans</i> )                    |
| TERG_00439 | 1.87 | hypothetical protein                                                       |
| TERG_04417 | 1.87 | DUF455 domain protein ( <i>A. benhamiae</i> )                              |
| TERG_06771 | 1.87 | FAD binding domain protein ( <i>A. benhamiae</i> )                         |
| TERG_06368 | 1.87 | hypothetical protein                                                       |
| TERG_06552 | 1.87 | aspartic-type endopeptidase (OpsB), putative ( <i>T. verrucosum</i> )      |
| TERG_12139 | 1.86 | hypothetical protein                                                       |
| TERG_02714 | 1.86 | proteinase, putative ( <i>A. benhamiae</i> )                               |
| TERG_01173 | 1.86 | hypothetical protein                                                       |
| TERG_03179 | 1.85 | NlpC/P60-like cell-wall peptidase, putative ( <i>A. benhamiae</i> )        |

|            |                                                                                      |
|------------|--------------------------------------------------------------------------------------|
| TERG_00059 | 1.84 hypothetical protein                                                            |
| TERG_04429 | 1.84 MORN repeat-containing protein ( <i>T. equinum</i> )                            |
| TERG_05452 | 1.84 GABA permease ( <i>T. tonsurans</i> )                                           |
| TERG_05909 | 1.83 hypothetical protein                                                            |
| TERG_03562 | 1.83 hypothetical protein                                                            |
| TERG_06978 | 1.83 SirQ protein ( <i>T. equinum</i> )                                              |
| TERG_03945 | 1.83 hypothetical protein                                                            |
| TERG_03789 | 1.83 glutamine-serine rich protein MS8, putative ( <i>A. benhamiae</i> )             |
| TERG_11762 | 1.83 lysine-specific permease ( <i>M. gypseum</i> )                                  |
| TERG_08601 | 1.83 hypothetical protein                                                            |
| TERG_02453 | 1.83 hypothetical protein                                                            |
| TERG_00776 | 1.82 MFS transporter ( <i>T. tonsurans</i> )                                         |
| TERG_03684 | 1.82 stress activated MAP kinase interacting protein ( <i>T. equinum</i> )           |
| TERG_00590 | 1.82 hypothetical protein                                                            |
| TERG_03456 | 1.82 hypothetical protein                                                            |
| TERG_07265 | 1.82 sucrase/ferredoxin domain-containing protein ( <i>T. equinum</i> )              |
| TERG_00517 | 1.81 hypothetical protein                                                            |
| TERG_02561 | 1.81 ubiquinone biosynthesis protein Coq7 ( <i>T. tonsurans</i> )                    |
| TERG_07143 | 1.81 potassium/sodium efflux P-type ATPase, fungal-type                              |
| TERG_04543 | 1.81 aminotransferase GliI ( <i>T. equinum</i> )                                     |
| TERG_08069 | 1.81 glutathione-disulfide reductase                                                 |
| TERG_03486 | 1.80 Lectin C-type domain protein ( <i>T. verrucosum</i> )                           |
| TERG_02412 | 1.80 HHE domain protein ( <i>T. verrucosum</i> )                                     |
| TERG_00252 | 1.80 hypothetical protein                                                            |
| TERG_06044 | 1.80 hypothetical protein                                                            |
| TERG_03228 | 1.80 transcriptional regulator PacG/VIB-1 ( <i>T. verrucosum</i> )                   |
| TERG_08123 | 1.80 C6 finger domain protein, putative ( <i>A. benhamiae</i> )                      |
| TERG_04774 | 1.80 isoflavone reductase family protein ( <i>T. verrucosum</i> )                    |
| TERG_12349 | 1.80 hypothetical protein                                                            |
| TERG_12114 | 1.79 hypothetical protein                                                            |
| TERG_06460 | 1.79 LEM3/CDC50 family protein ( <i>T. tonsurans</i> )                               |
| TERG_05304 | 1.79 cyanate hydratase                                                               |
| TERG_03653 | 1.79 hypothetical protein                                                            |
| TERG_12075 | 1.79 hypothetical protein                                                            |
| TERG_06802 | 1.79 hypothetical protein                                                            |
| TERG_07188 | 1.79 xanthine dehydrogenase ( <i>T. tonsurans</i> )                                  |
| TERG_06594 | 1.78 DUF1183 domain-containing protein ( <i>T. equinum</i> )                         |
| TERG_12176 | 1.78 hypothetical protein                                                            |
| TERG_11634 | 1.77 DUF907 domain protein ( <i>T. verrucosum</i> )                                  |
| TERG_00331 | 1.77 golgi apparatus membrane protein TVP18 ( <i>T. tonsurans</i> )                  |
| TERG_02632 | 1.77 autophagy cysteine endopeptidase Atg4, putative ( <i>A. benhamiae</i> )         |
| TERG_01049 | 1.77 hypothetical protein                                                            |
| TERG_06801 | 1.77 cyclic nucleotide-binding domain-containing protein ( <i>T. tonsurans</i> )     |
| TERG_12055 | 1.77 vegetative cell wall protein gp1 ( <i>M. canis</i> )                            |
| TERG_02063 | 1.76 hypothetical protein                                                            |
| TERG_04915 | 1.76 alpha/beta hydrolase ( <i>T. tonsurans</i> )                                    |
| TERG_08100 | 1.76 CDP-diacylglycerol-inositol 3-phosphatidyltransferase PIS ( <i>T. equinum</i> ) |
| TERG_12712 | 1.76 hypothetical protein                                                            |
| TERG_00483 | 1.76 hypothetical protein                                                            |

|            |                                                                                   |
|------------|-----------------------------------------------------------------------------------|
| TERG_04338 | 1.75 subtilisin-like serine protease pepC                                         |
| TERG_05136 | 1.75 cytochrome P450 oxidoreductase GliC ( <i>A. benhamiae</i> )                  |
| TERG_12265 | 1.75 glutathione-dependent formaldehyde-activating enzyme ( <i>T. tonsurans</i> ) |
| TERG_01546 | 1.75 oxidoreductase ( <i>T. tonsurans</i> )                                       |
| TERG_07489 | 1.75 hypothetical protein                                                         |
| TERG_06543 | 1.75 phosphatidate cytidyltransferase ( <i>T. tonsurans</i> )                     |
| TERG_12516 | 1.75 DNA binding protein SART-1 ( <i>T. tonsurans</i> )                           |
| TERG_01551 | 1.75 hypothetical protein                                                         |
| TERG_08255 | 1.75 carboxypeptidase S1, putative ( <i>A. benhamiae</i> )                        |
| TERG_06239 | 1.75 hypothetical protein                                                         |
| TERG_01328 | 1.74 metalloredutase transmembrane component, putative ( <i>A. benhamiae</i> )    |
| TERG_04385 | 1.74 serine/threonine protein kinase ( <i>T. tonsurans</i> )                      |
| TERG_08535 | 1.74 RING finger protein ( <i>A. benhamiae</i> )                                  |
| TERG_05098 | 1.74 arginine metabolism regulation protein iii ( <i>T. verrucosum</i> )          |
| TERG_11795 | 1.74 hypothetical protein                                                         |
| TERG_01889 | 1.74 RING finger domain-containing protein ( <i>T. tonsurans</i> )                |
| TERG_06089 | 1.74 PH domain-containing protein ( <i>T. equinum</i> )                           |
| TERG_00338 | 1.74 glutamate carboxypeptidase ( <i>T. tonsurans</i> )                           |
| TERG_03705 | 1.74 cytochrome P450 monooxygenase, putative ( <i>A. benhamiae</i> )              |
| TERG_00148 | 1.74 hypothetical protein                                                         |
| TERG_02918 | 1.74 alkaline phytoceramidase ( <i>T. equinum</i> )                               |
| TERG_00100 | 1.73 flavin-containing monooxygenase ( <i>T. equinum</i> )                        |
| TERG_02222 | 1.73 TBC domain-containing protein ( <i>T. equinum</i> )                          |
| TERG_05842 | 1.73 png1 ( <i>T. equinum</i> )                                                   |
| TERG_00836 | 1.73 QDE-2-interacting protein ( <i>M. gypseum</i> )                              |
| TERG_00954 | 1.72 hypothetical protein                                                         |
| TERG_03283 | 1.72 diene lactone hydrolase ( <i>M. gypseum</i> )                                |
| TERG_07666 | 1.72 hypothetical protein                                                         |
| TERG_12370 | 1.72 MFS multidrug transporter, putative ( <i>A. benhamiae</i> )                  |
| TERG_06354 | 1.72 SVP1-like protein ( <i>T. tonsurans</i> )                                    |
| TERG_07762 | 1.71 hypothetical protein                                                         |
| TERG_00680 | 1.71 fimbrin ( <i>T. tonsurans</i> )                                              |
| TERG_11557 | 1.71 luciferin 4-monooxygenase ( <i>T. equinum</i> )                              |
| TERG_01644 | 1.71 SNF2 family helicase/ATPase ( <i>T. equinum</i> )                            |
| TERG_01357 | 1.71 hypothetical protein                                                         |
| TERG_05854 | 1.71 beta-lactamase ( <i>T. tonsurans</i> )                                       |
| TERG_05118 | 1.71 actin cytoskeleton organization protein ( <i>T. tonsurans</i> )              |
| TERG_04654 | 1.71 ubiquitin carboxyl-terminal hydrolase ( <i>T. tonsurans</i> )                |
| TERG_02243 | 1.70 hypothetical protein                                                         |
| TERG_07077 | 1.70 C6 transcription factor ( <i>T. equinum</i> )                                |
| TERG_00313 | 1.70 hemolysin-III channel protein Izh2 ( <i>T. tonsurans</i> )                   |
| TERG_03141 | 1.70 hypothetical protein                                                         |
| TERG_05554 | 1.70 integral membrane protein ( <i>T. equinum</i> )                              |
| TERG_05851 | 1.69 hypothetical protein                                                         |
| TERG_01843 | 1.69 inositol-3-phosphate synthase ( <i>T. tonsurans</i> )                        |
| TERG_05800 | 1.68 ubiquitin-protein ligase (Hul4), putative ( <i>A. benhamiae</i> )            |
| TERG_03332 | 1.68 mitochondrial carrier protein ( <i>T. tonsurans</i> )                        |
| TERG_02016 | 1.68 Atg15p ( <i>M. gypseum</i> )                                                 |
| TERG_07332 | 1.68 hypothetical protein                                                         |



|            |                                                                                  |
|------------|----------------------------------------------------------------------------------|
| TERG_12324 | 1.68 hypothetical protein                                                        |
| TERG_00267 | 1.68 hypothetical protein                                                        |
| TERG_04703 | 1.68 DUF1715 domain-containing protein ( <i>T. equinum</i> )                     |
| TERG_06247 | 1.67 DUF821 domain-containing protein ( <i>T. equinum</i> )                      |
| TERG_08378 | 1.67 hypothetical protein                                                        |
| TERG_03709 | 1.67 hypothetical protein                                                        |
| TERG_00803 | 1.66 DUF907 domain protein ( <i>A. benhamiae</i> )                               |
| TERG_03702 | 1.66 hypothetical protein                                                        |
| TERG_01153 | 1.66 hypothetical protein                                                        |
| TERG_04590 | 1.66 dihydrofolate synthetase Fol3 ( <i>T. equinum</i> )                         |
| TERG_01618 | 1.66 hypothetical protein                                                        |
| TERG_06681 | 1.66 glycogen debranching enzyme                                                 |
| TERG_07307 | 1.66 hypothetical protein                                                        |
| TERG_08824 | 1.65 hypothetical protein                                                        |
| TERG_03182 | 1.65 serine/threonine protein kinase ( <i>T. equinum</i> )                       |
| TERG_08381 | 1.65 NUDIX domain-containing protein ( <i>T. equinum</i> )                       |
| TERG_06111 | 1.65 DUF1711 domain-containing protein ( <i>M. canis</i> )                       |
| TERG_02816 | 1.64 diene lactone hydrolase ( <i>T. equinum</i> )                               |
| TERG_08708 | 1.64 SesA protein ( <i>T. equinum</i> )                                          |
| TERG_06209 | 1.63 UTR2 protein ( <i>M. gypseum</i> )                                          |
| TERG_07224 | 1.63 hypothetical protein                                                        |
| TERG_06016 | 1.63 glycosyl hydrolase ( <i>T. tonsurans</i> )                                  |
| TERG_06675 | 1.63 GliK protein ( <i>T. equinum</i> )                                          |
| TERG_12629 | 1.63 NAD(P) transhydrogenase ( <i>T. equinum</i> )                               |
| TERG_07567 | 1.63 DUF647 domain-containing protein ( <i>T. equinum</i> )                      |
| TERG_04123 | 1.63 hypothetical protein                                                        |
| TERG_04103 | 1.63 hypothetical protein                                                        |
| TERG_03533 | 1.62 DRAP deaminase, putative ( <i>A. benhamiae</i> )                            |
| TERG_02511 | 1.62 salicylate hydroxylase, putative ( <i>A. benhamiae</i> )                    |
| TERG_07996 | 1.62 hypothetical protein                                                        |
| TERG_01292 | 1.62 glycosyl hydrolase, putative ( <i>A. benhamiae</i> )                        |
| TERG_02843 | 1.62 C6 transcription factor ( <i>T. equinum</i> )                               |
| TERG_01856 | 1.62 CMGC/SRPK protein kinase                                                    |
| TERG_08044 | 1.61 GPI anchored protein, putative ( <i>A. benhamiae</i> )                      |
| TERG_05562 | 1.61 2-hydroxychromene-2-carboxylate isomerase, putative ( <i>A. benhamiae</i> ) |
| TERG_11885 | 1.61 ABC bile acid transporter, putative ( <i>T. verrucosum</i> )                |
| TERG_02481 | 1.61 F-box domain-containing protein ( <i>M. canis</i> )                         |
| TERG_01996 | 1.60 serine/threonine protein kinase                                             |
| TERG_06899 | 1.60 alkaline phosphatase ( <i>T. tonsurans</i> )                                |
| TERG_00780 | 1.60 hypothetical protein                                                        |
| TERG_01105 | 1.60 serine/threonine protein kinase ( <i>T. tonsurans</i> )                     |
| TERG_02567 | 1.60 phytanoyl-CoA dioxygenase ( <i>T. tonsurans</i> )                           |
| TERG_02140 | 1.59 bZIP transcription factor ( <i>T. tonsurans</i> )                           |
| TERG_11682 | 1.59 hypothetical protein                                                        |
| TERG_00860 | 1.59 LRP16 family protein ( <i>T. tonsurans</i> )                                |
| TERG_02410 | 1.59 cytoskeleton assembly control protein Sla2 ( <i>T. tonsurans</i> )          |
| TERG_12057 | 1.58 hypothetical protein                                                        |
| TERG_08902 | 1.58 hypothetical protein                                                        |
| TERG_03408 | 1.58 ZIP metal ion transporter ( <i>T. equinum</i> )                             |

|            |                                                                         |
|------------|-------------------------------------------------------------------------|
| TERG_08811 | 1.58 hypothetical protein                                               |
| TERG_11770 | 1.58 hypothetical protein                                               |
| TERG_01841 | 1.58 hypothetical protein                                               |
| TERG_07761 | 1.58 hypothetical protein                                               |
| TERG_06765 | 1.58 ULK/ULK protein kinase                                             |
| TERG_08287 | 1.58 ATP-citrate synthase ( <i>T. equinum</i> )                         |
| TERG_02524 | 1.58 proline-specific permease ( <i>T. equinum</i> )                    |
| TERG_03032 | 1.58 autophagy protein Atg13, putative ( <i>A. benhamiae</i> )          |
| TERG_02445 | 1.58 hypothetical protein                                               |
| TERG_06294 | 1.57 V-SNARE ( <i>T. equinum</i> )                                      |
| TERG_04210 | 1.57 CAMKK/CAMKK-META protein kinase                                    |
| TERG_07917 | 1.57 hypothetical protein                                               |
| TERG_08066 | 1.57 STE/STE7 protein kinase                                            |
| TERG_08011 | 1.57 metallocarboxypeptidase A-like protein                             |
| TERG_07707 | 1.57 C6 zinc finger domain-containing protein ( <i>T. equinum</i> )     |
| TERG_08878 | 1.57 hypothetical protein                                               |
| TERG_01914 | 1.57 trichodiene oxygenase ( <i>T. equinum</i> )                        |
| TERG_02550 | 1.57 ZZ type zinc finger domain protein ( <i>T. verrucosum</i> )        |
| TERG_05963 | 1.57 WD repeat protein ( <i>T. tonsurans</i> )                          |
| TERG_06836 | 1.56 CAMK/CAMK1/CAMK1-RCK protein kinase                                |
| TERG_12636 | 1.56 hypothetical protein                                               |
| TERG_04434 | 1.56 DNA repair protein                                                 |
| TERG_00349 | 1.55 hypothetical protein                                               |
| TERG_06472 | 1.55 ketoreductase ( <i>T. tonsurans</i> )                              |
| TERG_05813 | 1.55 1-phosphatidylinositol-3-phosphate 5-kinase ( <i>T. equinum</i> )  |
| TERG_11943 | 1.55 MFS maltose permease ( <i>T. tonsurans</i> )                       |
| TERG_06533 | 1.55 glyoxalase family protein ( <i>A. benhamiae</i> )                  |
| TERG_07706 | 1.54 hypothetical protein                                               |
| TERG_01433 | 1.54 WD domain, G-beta repeat protein ( <i>A. benhamiae</i> )           |
| TERG_08427 | 1.54 C6 transcription factor, putative ( <i>A. benhamiae</i> )          |
| TERG_08288 | 1.54 ATP-citrate synthase subunit 1                                     |
| TERG_12630 | 1.54 nicotinamide nucleotide transhydrogenase ( <i>T. tonsurans</i> )   |
| TERG_06884 | 1.54 C6 transcription factor (War1), putative ( <i>T. verrucosum</i> )  |
| TERG_01603 | 1.53 UBX domain-containing protein ( <i>T. equinum</i> )                |
| TERG_02087 | 1.53 hypothetical protein                                               |
| TERG_05230 | 1.53 hypothetical protein                                               |
| TERG_05552 | 1.53 DNA mismatch repair protein MutL ( <i>T. tonsurans</i> )           |
| TERG_07174 | 1.53 vesicle transport V-snare protein ( <i>T. equinum</i> )            |
| TERG_02527 | 1.53 WD40 repeat protein ( <i>A. benhamiae</i> )                        |
| TERG_00097 | 1.53 hypothetical protein                                               |
| TERG_03835 | 1.53 hypothetical protein                                               |
| TERG_07223 | 1.53 hypothetical protein                                               |
| TERG_00286 | 1.53 ABC transporter ( <i>T. tonsurans</i> )                            |
| TERG_03200 | 1.53 DNA repair and recombination protein RAD26 ( <i>T. tonsurans</i> ) |
| TERG_05802 | 1.53 hypothetical protein                                               |
| TERG_00580 | 1.52 7-dehydrocholesterol reductase ( <i>T. equinum</i> )               |
| TERG_00589 | 1.52 phosphoesterase ( <i>T. tonsurans</i> )                            |
| TERG_00570 | 1.52 autophagy protein ( <i>T. equinum</i> )                            |
| TERG_00969 | 1.52 hypothetical protein                                               |

|            |                                                                                   |
|------------|-----------------------------------------------------------------------------------|
| TERG_05144 | 1.52 hypothetical protein                                                         |
| TERG_07086 | 1.52 hypothetical protein                                                         |
| TERG_01811 | 1.51 triacylglycerol lipase, putative ( <i>A. benhamiae</i> )                     |
| TERG_00654 | 1.51 hypothetical protein                                                         |
| TERG_12393 | 1.51 hypothetical protein                                                         |
| TERG_11582 | 1.51 hypothetical protein                                                         |
| TERG_05580 | 1.51 hypothetical protein                                                         |
| TERG_08848 | 1.51 thioredoxin, putative ( <i>A. benhamiae</i> )                                |
| TERG_05405 | 1.51 methionine permease ( <i>T. equinum</i> )                                    |
| TERG_02369 | 1.51 MFS transporter ( <i>T. tonsurans</i> )                                      |
| TERG_07492 | 1.50 sugar transporter STL1 ( <i>T. tonsurans</i> )                               |
| TERG_06777 | 1.50 hypothetical protein                                                         |
| TERG_04414 | 1.50 isoflavone reductase family protein (CipA), putative ( <i>A. benhamiae</i> ) |
| TERG_07337 | -1.50 54S ribosomal protein RML2 ( <i>T. equinum</i> )                            |
| TERG_02122 | -1.50 adenylate-forming enzyme, putative ( <i>A. benhamiae</i> )                  |
| TERG_01643 | -1.50 hypothetical protein                                                        |
| TERG_04382 | -1.50 c-14 sterol reductase ( <i>T. tonsurans</i> )                               |
| TERG_12344 | -1.51 kinesin family protein ( <i>T. tonsurans</i> )                              |
| TERG_07335 | -1.51 G2/M-specific cyclin NimE ( <i>T. tonsurans</i> )                           |
| TERG_08318 | -1.51 HAD superfamily hydrolase ( <i>T. tonsurans</i> )                           |
| TERG_05384 | -1.51 hypothetical protein                                                        |
| TERG_00211 | -1.51 proteasome subunit alpha type 6 ( <i>T. equinum</i> )                       |
| TERG_07895 | -1.51 prefoldin, alpha subunit                                                    |
| TERG_08991 | -1.51 ATPase 2 nuclear control ( <i>M. gypseum</i> )                              |
| TERG_02465 | -1.51 aminoalcoholphosphotransferase ( <i>T. equinum</i> )                        |
| TERG_04192 | -1.51 lactonohydrolase, putative ( <i>A. benhamiae</i> )                          |
| TERG_06122 | -1.52 hypothetical protein                                                        |
| TERG_12392 | -1.52 hypothetical protein                                                        |
| TERG_08675 | -1.52 hypothetical protein                                                        |
| TERG_12355 | -1.52 hypothetical protein                                                        |
| TERG_00524 | -1.52 trans-sialidase ( <i>M. canis</i> )                                         |
| TERG_07157 | -1.52 U3 small nucleolar RNA-associated protein 5 ( <i>T. equinum</i> )           |
| TERG_05366 | -1.52 hypothetical protein                                                        |
| TERG_06976 | -1.52 separin, putative ( <i>T. verrucosum</i> )                                  |
| TERG_04508 | -1.52 AAA ATPase ( <i>T. equinum</i> )                                            |
| TERG_00170 | -1.53 hypothetical protein                                                        |
| TERG_03642 | -1.53 hypothetical protein                                                        |
| TERG_00008 | -1.53 MFS phospholipid transporter ( <i>T. tonsurans</i> )                        |
| TERG_00885 | -1.53 60S ribosome biogenesis protein Rrp14 ( <i>T. tonsurans</i> )               |
| TERG_00004 | -1.53 alanine aminotransferase ( <i>T. tonsurans</i> )                            |
| TERG_02250 | -1.53 cyclopropane-fatty-acyl-phospholipid synthase ( <i>T. tonsurans</i> )       |
| TERG_07587 | -1.53 hypothetical protein                                                        |
| TERG_06305 | -1.53 DNA-directed RNA polymerase I and III ( <i>T. tonsurans</i> )               |
| TERG_04087 | -1.53 DnaJ domain-containing protein ( <i>T. tonsurans</i> )                      |
| TERG_00192 | -1.53 ATP-dependent rRNA helicase spb4 ( <i>T. tonsurans</i> )                    |
| TERG_08845 | -1.54 pyridoxamine phosphate oxidase ( <i>T. tonsurans</i> )                      |
| TERG_03498 | -1.54 pre-rRNA processing protein Tsr1 ( <i>T. tonsurans</i> )                    |
| TERG_12121 | -1.54 DNA replication licensing factor mcm5 ( <i>T. tonsurans</i> )               |
| TERG_12504 | -1.54 MFS multidrug transporter ( <i>T. equinum</i> )                             |

|            |                                                                                |
|------------|--------------------------------------------------------------------------------|
| TERG_00538 | -1.54 oxidoreductase ( <i>T. tonsurans</i> )                                   |
| TERG_00819 | -1.54 PE repeat family protein ( <i>T. verrucosum</i> )                        |
| TERG_04586 | -1.54 ribonucleoside-diphosphate reductase large chain                         |
| TERG_01761 | -1.54 hypothetical protein                                                     |
| TERG_06366 | -1.54 CAMK protein kinase                                                      |
| TERG_07799 | -1.54 fatty acids protein 3 elongation ( <i>T. equinum</i> )                   |
| TERG_05809 | -1.55 hypothetical protein                                                     |
| TERG_12434 | -1.55 hypothetical protein                                                     |
| TERG_12395 | -1.55 hypothetical protein                                                     |
| TERG_04636 | -1.55 4-hydroxybenzoate polyprenyl transferase                                 |
| TERG_04378 | -1.55 aldehyde reductase I (ARI), putative ( <i>T. verrucosum</i> )            |
| TERG_02037 | -1.55 nucleic acid-binding protein ( <i>A. benhamiae</i> )                     |
| TERG_06553 | -1.55 hypothetical protein                                                     |
| TERG_07120 | -1.56 hypothetical protein                                                     |
| TERG_02057 | -1.56 hypothetical protein                                                     |
| TERG_06933 | -1.56 hypothetical protein                                                     |
| TERG_11862 | -1.56 integral membrane protein ( <i>T. tonsurans</i> )                        |
| TERG_02176 | -1.56 small nuclear ribonucleoprotein LSM2 ( <i>T. equinum</i> )               |
| TERG_05790 | -1.56 HMG box protein, putative ( <i>A. benhamiae</i> )                        |
| TERG_03174 | -1.57 MFS siderochrome iron transporter MirB ( <i>T. verrucosum</i> )          |
| TERG_12340 | -1.57 hypothetical protein                                                     |
| TERG_11847 | -1.57 hypothetical protein                                                     |
| TERG_03256 | -1.57 carbonate dehydratase ( <i>T. equinum</i> )                              |
| TERG_01303 | -1.57 hypothetical protein                                                     |
| TERG_04060 | -1.57 C2H2 type zinc finger domain-containing protein ( <i>T. equinum</i> )    |
| TERG_01771 | -1.57 FAD binding monooxygenase, putative ( <i>T. verrucosum</i> )             |
| TERG_04908 | -1.57 signal recognition particle, putative ( <i>A. benhamiae</i> )            |
| TERG_03777 | -1.57 hypothetical protein                                                     |
| TERG_06918 | -1.58 hypothetical protein                                                     |
| TERG_07963 | -1.58 hypothetical protein                                                     |
| TERG_00983 | -1.58 eukaryotic translation initiation factor 3 subunit K                     |
| TERG_12053 | -1.58 HEAT repeat protein ( <i>T. verrucosum</i> )                             |
| TERG_07341 | -1.58 DNA replication helicase Dna2 ( <i>T. tonsurans</i> )                    |
| TERG_02076 | -1.58 hypothetical protein                                                     |
| TERG_00372 | -1.58 hypothetical protein                                                     |
| TERG_01231 | -1.58 ribosomal large subunit biogenesis protein MAK16 ( <i>T. tonsurans</i> ) |
| TERG_02538 | -1.59 carboxylesterase ( <i>T. equinum</i> )                                   |
| TERG_00386 | -1.59 hypothetical protein                                                     |
| TERG_11809 | -1.59 hydroxymethylglutaryl-CoA synthase                                       |
| TERG_01812 | -1.59 nucleolar complex protein 14 ( <i>T. equinum</i> )                       |
| TERG_02788 | -1.59 DNA-directed RNA polymerase I ( <i>T. tonsurans</i> )                    |
| TERG_04349 | -1.59 hypothetical protein                                                     |
| TERG_00894 | -1.59 translation initiation factor IF-2                                       |
| TERG_05370 | -1.59 hypothetical protein                                                     |
| TERG_05254 | -1.60 translation initiation factor RLII                                       |
| TERG_04684 | -1.60 shugoshin family protein ( <i>A. benhamiae</i> )                         |
| TERG_12200 | -1.60 hypothetical protein                                                     |
| TERG_01697 | -1.60 hypothetical protein                                                     |
| TERG_01239 | -1.60 Mis6 domain-containing protein ( <i>T. equinum</i> )                     |

|            |                                                                                                    |
|------------|----------------------------------------------------------------------------------------------------|
| TERG_08234 | -1.60 TCTP family protein ( <i>T. verrucosum</i> )                                                 |
| TERG_07613 | -1.60 nuclear envelope protein ( <i>T. equinum</i> )                                               |
| TERG_03345 | -1.60 hypothetical protein                                                                         |
| TERG_01443 | -1.61 ABC multidrug transporter ( <i>T. tonsurans</i> )                                            |
| TERG_07061 | -1.61 CMGC/SRPK protein kinase                                                                     |
| TERG_02293 | -1.61 hypothetical protein                                                                         |
| TERG_02393 | -1.61 hypothetical protein                                                                         |
| TERG_02575 | -1.61 hypothetical protein                                                                         |
| TERG_02973 | -1.61 morphogenesis protein (Msb1), putative ( <i>T. verrucosum</i> )                              |
| TERG_02854 | -1.61 dynein light chain ( <i>T. tonsurans</i> )                                                   |
| TERG_11721 | -1.61 acyl-CoA dehydrogenase ( <i>T. tonsurans</i> )                                               |
| TERG_06144 | -1.61 cell wall serine-threonine-rich galactomannoprotein Mp1 ( <i>A. benhamiae</i> )              |
| TERG_06129 | -1.61 60S ribosomal protein                                                                        |
| TERG_11758 | -1.62 DUF866 domain-containing protein ( <i>T. equinum</i> )                                       |
| TERG_03084 | -1.62 pentatricopeptide repeat protein ( <i>A. benhamiae</i> )                                     |
| TERG_01507 | -1.62 extracellular proline-glycine rich protein ( <i>T. verrucosum</i> )                          |
| TERG_05388 | -1.62 ribosome biogenesis protein ( <i>T. tonsurans</i> )                                          |
| TERG_04410 | -1.62 hypothetical protein                                                                         |
| TERG_06230 | -1.62 hypothetical protein                                                                         |
| TERG_04819 | -1.62 Fe superoxide dismutase ( <i>T. tonsurans</i> )                                              |
| TERG_05701 | -1.62 C4-dicarboxylate transporter/malic acid transport protein, putative ( <i>T. verrucosum</i> ) |
| TERG_00249 | -1.62 ATP-dependent rRNA helicase RRP3                                                             |
| TERG_06621 | -1.62 60S ribosomal subunit assembly/export protein loc1 ( <i>T. tonsurans</i> )                   |
| TERG_05967 | -1.63 hypothetical protein                                                                         |
| TERG_02590 | -1.63 peptidyl-prolyl cis-trans isomerase D                                                        |
| TERG_02251 | -1.63 hypothetical protein                                                                         |
| TERG_00974 | -1.63 2,3-bisphosphoglycerate-independent phosphoglycerate mutase                                  |
| TERG_04062 | -1.63 low-temperature viability protein Itv1 ( <i>T. tonsurans</i> )                               |
| TERG_06964 | -1.63 NTF2 domain-containing protein ( <i>T. tonsurans</i> )                                       |
| TERG_02326 | -1.63 WD domain-containing protein ( <i>T. tonsurans</i> )                                         |
| TERG_02616 | -1.63 integral membrane protein ( <i>T. equinum</i> )                                              |
| TERG_05846 | -1.63 G1/S-specific cyclin CLN1 ( <i>T. equinum</i> )                                              |
| TERG_01257 | -1.63 nascent polypeptide-associated complex subunit alpha                                         |
| TERG_08884 | -1.63 GPI-anchored cell surface glycoprotein, putative ( <i>T. verrucosum</i> )                    |
| TERG_06528 | -1.64 Delta(24(24(1)))-sterol reductase ( <i>T. equinum</i> )                                      |
| TERG_08429 | -1.64 eukaryotic translation initiation factor 3 subunit H                                         |
| TERG_00893 | -1.64 mitochondrial carrier protein, putative ( <i>T. verrucosum</i> )                             |
| TERG_05434 | -1.64 ribosome associated DnaJ chaperone Zuotin ( <i>T. equinum</i> )                              |
| TERG_06375 | -1.64 hypothetical protein                                                                         |
| TERG_01959 | -1.64 RNA polymerase Rpb1 C-terminal repeat domain-containing protein ( <i>T. equinum</i> )        |
| TERG_01679 | -1.64 Trm112p-like protein ( <i>T. equinum</i> )                                                   |
| TERG_12131 | -1.64 alcohol dehydrogenase ( <i>T. tonsurans</i> )                                                |
| TERG_05891 | -1.65 MFS phosphate transporter ( <i>T. equinum</i> )                                              |
| TERG_12325 | -1.65 hypothetical protein                                                                         |
| TERG_08623 | -1.65 O-methyltransferase GliM2 ( <i>T. equinum</i> )                                              |
| TERG_08443 | -1.66 adenosylhomocysteinase                                                                       |
| TERG_04307 | -1.66 hypothetical protein                                                                         |
| TERG_03339 | -1.66 alternative oxidase, mitochondrial                                                           |

|            |                                                                                       |
|------------|---------------------------------------------------------------------------------------|
| TERG_03587 | -1.66 WD repeat protein ( <i>T. verrucosum</i> )                                      |
| TERG_07444 | -1.66 nuclear segregation protein ( <i>T. tonsurans</i> )                             |
| TERG_05002 | -1.67 UDP-glucose 4-epimerase GalE                                                    |
| TERG_05925 | -1.67 EF-hand protein ( <i>T. tonsurans</i> )                                         |
| TERG_03205 | -1.67 DNA polymerase alpha catalytic subunit ( <i>T. equinum</i> )                    |
| TERG_12620 | -1.67 hypothetical protein                                                            |
| TERG_00757 | -1.68 hypothetical protein                                                            |
| TERG_07557 | -1.68 hypothetical protein                                                            |
| TERG_04339 | -1.68 signal transduction protein Syg1, putative ( <i>A. benhamiae</i> )              |
| TERG_07473 | -1.68 DNA-directed RNA polymerase I ( <i>T. tonsurans</i> )                           |
| TERG_06744 | -1.68 fructose-bisphosphate aldolase 1                                                |
| TERG_00124 | -1.68 peroxisomal matrix protein ( <i>T. equinum</i> )                                |
| TERG_07131 | -1.68 phosphotransmitter protein Ypd1 ( <i>T. equinum</i> )                           |
| TERG_03453 | -1.68 eukaryotic translation initiation factor 5 ( <i>T. tonsurans</i> )              |
| TERG_01968 | -1.68 RNA binding protein, putative ( <i>T. verrucosum</i> )                          |
| TERG_05948 | -1.68 protein kinase subdomain-containing protein ( <i>T. equinum</i> )               |
| TERG_06358 | -1.68 dicer ( <i>T. tonsurans</i> )                                                   |
| TERG_04131 | -1.68 heat shock trehalose synthase, putative ( <i>T. verrucosum</i> )                |
| TERG_03270 | -1.68 small nucleolar ribonucleoprotein complex subunit ( <i>T. tonsurans</i> )       |
| TERG_07616 | -1.68 diphosphomevalonate decarboxylase                                               |
| TERG_04995 | -1.68 ribosome biogenesis protein Urb1, putative ( <i>A. benhamiae</i> )              |
| TERG_01310 | -1.69 nascent polypeptide-associated complex subunit beta                             |
| TERG_07024 | -1.69 endoribonuclease L-PSP ( <i>T. tonsurans</i> )                                  |
| TERG_08368 | -1.69 TTK protein kinase                                                              |
| TERG_08497 | -1.69 mRNA turnover protein 4 ( <i>T. equinum</i> )                                   |
| TERG_05558 | -1.69 ornithine decarboxylase, putative ( <i>T. verrucosum</i> )                      |
| TERG_11915 | -1.69 nucleolus protein required for cell viability ( <i>T. tonsurans</i> )           |
| TERG_05956 | -1.69 rRNA processing protein Ebp2p ( <i>T. equinum</i> )                             |
| TERG_06150 | -1.69 deoxyuridine 5'-triphosphate nucleotidohydrolase                                |
| TERG_01206 | -1.69 pre-mRNA-splicing factor ATP-dependent RNA helicase PRP43 ( <i>T. equinum</i> ) |
| TERG_06662 | -1.70 eukaryotic translation initiation factor 3 subunit B                            |
| TERG_06578 | -1.70 glutathione S-transferase, putative ( <i>A. benhamiae</i> )                     |
| TERG_02617 | -1.70 DNA primase subunit Pri1 ( <i>T. tonsurans</i> )                                |
| TERG_04959 | -1.70 hypothetical protein                                                            |
| TERG_03124 | -1.70 histone                                                                         |
| TERG_00977 | -1.70 hypothetical protein                                                            |
| TERG_00703 | -1.70 nuclear migration protein, putative ( <i>A. benhamiae</i> )                     |
| TERG_03172 | -1.71 sodium/phosphate symporter ( <i>T. tonsurans</i> )                              |
| TERG_03499 | -1.71 U3 small nucleolar RNA-associated protein 7 ( <i>T. equinum</i> )               |
| TERG_00834 | -1.71 60S ribosomal protein L24b ( <i>T. equinum</i> )                                |
| TERG_12503 | -1.71 polyamine transporter 2                                                         |
| TERG_01612 | -1.71 enolase                                                                         |
| TERG_00373 | -1.71 hypothetical protein                                                            |
| TERG_08755 | -1.71 M-phase inducer phosphatase ( <i>T. tonsurans</i> )                             |
| TERG_05261 | -1.72 karyopherin alpha subunit ( <i>T. tonsurans</i> )                               |
| TERG_04402 | -1.72 glyceraldehyde-3-phosphate dehydrogenase                                        |
| TERG_07361 | -1.72 hybrid PKS-NRPS enzyme, putative ( <i>A. benhamiae</i> )                        |
| TERG_01957 | -1.72 proteinase T ( <i>M. gypseum</i> )                                              |
| TERG_04746 | -1.72 nucleolar GTP-binding protein ( <i>T. tonsurans</i> )                           |

|            |                                                                                         |
|------------|-----------------------------------------------------------------------------------------|
| TERG_07539 | -1.72 multidrug resistance protein ( <i>T. tonsurans</i> )                              |
| TERG_02319 | -1.72 metallo-beta-lactamase superfamily protein ( <i>T. equinum</i> )                  |
| TERG_05242 | -1.73 PUF6 ( <i>M. gypseum</i> )                                                        |
| TERG_02772 | -1.73 DNA polymerase V ( <i>T. tonsurans</i> )                                          |
| TERG_07958 | -1.73 myosin class II heavy chain (MHC), putative ( <i>T. verrucosum</i> )              |
| TERG_02023 | -1.73 extracellular matrix protein, putative ( <i>T. verrucosum</i> )                   |
| TERG_01787 | -1.73 integral membrane protein ( <i>T. equinum</i> )                                   |
| TERG_08918 | -1.73 hypothetical protein                                                              |
| TERG_12373 | -1.73 multidrug resistance protein ( <i>T. tonsurans</i> )                              |
| TERG_07547 | -1.73 RGS domain-containing protein ( <i>T. tonsurans</i> )                             |
| TERG_03625 | -1.74 hypothetical protein                                                              |
| TERG_07736 | -1.74 hypothetical protein                                                              |
| TERG_00573 | -1.75 hypothetical protein                                                              |
| TERG_03497 | -1.75 hemolysin-III family protein ( <i>T. equinum</i> )                                |
| TERG_12631 | -1.75 conserved lysine-rich protein, putative ( <i>T. verrucosum</i> )                  |
| TERG_05865 | -1.76 integral membrane protein, Mpv17/PMP22 family, putative ( <i>T. verrucosum</i> )  |
| TERG_08125 | -1.76 nucleolar complex protein 2 ( <i>T. equinum</i> )                                 |
| TERG_02866 | -1.76 ribosome biogenesis protein ERB1                                                  |
| TERG_01377 | -1.76 hypothetical protein                                                              |
| TERG_07641 | -1.76 GPI-anchored cell wall protein Pst1, putative ( <i>A. benhamiae</i> )             |
| TERG_04616 | -1.76 hypothetical protein                                                              |
| TERG_06906 | -1.76 DNA mismatch repair protein msh6 ( <i>T. equinum</i> )                            |
| TERG_01046 | -1.76 H/ACA ribonucleoprotein complex subunit 1                                         |
| TERG_00257 | -1.77 conserved predicted protein ( <i>A. benhamiae</i> )                               |
| TERG_01010 | -1.77 Leucine Rich Repeat domain protein ( <i>A. benhamiae</i> )                        |
| TERG_00181 | -1.77 nucleolar protein 58                                                              |
| TERG_11525 | -1.77 hypothetical protein                                                              |
| TERG_05074 | -1.77 NADP-dependent L-serine/L-allo-threonine dehydrogenase ydfG ( <i>M. gypseum</i> ) |
| TERG_05941 | -1.78 stress responsive A/B barrel domain-containing protein ( <i>T. equinum</i> )      |
| TERG_11600 | -1.78 MFS transporter ( <i>T. tonsurans</i> )                                           |
| TERG_12447 | -1.78 F-box domain-containing protein ( <i>M. gypseum</i> )                             |
| TERG_08391 | -1.78 hypothetical protein                                                              |
| TERG_02399 | -1.78 RNA-directed RNA polymerase ( <i>T. tonsurans</i> )                               |
| TERG_00456 | -1.78 cysteine dioxygenase, putative ( <i>A. benhamiae</i> )                            |
| TERG_11907 | -1.78 FAD binding domain containing protein ( <i>T. equinum</i> )                       |
| TERG_08289 | -1.78 Rpp14 family protein ( <i>T. equinum</i> )                                        |
| TERG_08236 | -1.79 hypothetical protein                                                              |
| TERG_04964 | -1.79 RNA-binding protein ( <i>A. benhamiae</i> )                                       |
| TERG_02888 | -1.80 PWI domain mRNA processing protein, putative ( <i>T. verrucosum</i> )             |
| TERG_00117 | -1.80 SNF2 family helicase, putative ( <i>T. verrucosum</i> )                           |
| TERG_03935 | -1.80 hypothetical protein                                                              |
| TERG_06810 | -1.80 hypothetical protein                                                              |
| TERG_12632 | -1.80 conserved lysine-rich protein, putative ( <i>A. benhamiae</i> )                   |
| TERG_06158 | -1.81 60S ribosomal protein L29                                                         |
| TERG_04790 | -1.81 arsenical-resistance protein                                                      |
| TERG_03977 | -1.81 hypothetical protein                                                              |
| TERG_01440 | -1.81 vegetative cell wall protein gp1 ( <i>M. canis</i> )                              |
| TERG_11869 | -1.81 cysteine protease atg4 ( <i>T. equinum</i> )                                      |
| TERG_00063 | -1.82 lysine-tRNA ligase                                                                |

|            |                                                                               |
|------------|-------------------------------------------------------------------------------|
| TERG_12119 | -1.82 hypothetical protein                                                    |
| TERG_06264 | -1.82 steroid monooxygenase, putative ( <i>T. verrucosum</i> )                |
| TERG_06222 | -1.82 MYB DNA-binding domain-containing protein ( <i>T. equinum</i> )         |
| TERG_01591 | -1.82 small nucleolar ribonucleoprotein complex subunit ( <i>T. equinum</i> ) |
| TERG_06844 | -1.82 40S ribosomal protein S21                                               |
| TERG_02058 | -1.82 ribosome biogenesis protein RPF2 ( <i>T. equinum</i> )                  |
| TERG_03364 | -1.83 hypothetical protein                                                    |
| TERG_03102 | -1.83 sterol 24-C-methyltransferase ( <i>T. equinum</i> )                     |
| TERG_12633 | -1.83 conserved lysine-rich protein, putative ( <i>A. benhamiae</i> )         |
| TERG_12526 | -1.83 hypothetical protein                                                    |
| TERG_00605 | -1.83 imidazoleglycerol-phosphate dehydratase ( <i>T. equinum</i> )           |
| TERG_12059 | -1.83 transporter smf2 ( <i>T. tonsurans</i> )                                |
| TERG_00640 | -1.83 eukaryotic translation initiation factor 3 subunit L                    |
| TERG_01853 | -1.84 hypothetical protein                                                    |
| TERG_07047 | -1.84 cholesterol delta-isomerase, putative ( <i>T. verrucosum</i> )          |
| TERG_07939 | -1.84 ribosomal RNA processing protein ( <i>T. equinum</i> )                  |
| TERG_06090 | -1.84 C2H2 transcription factor (TFIIIA), putative ( <i>T. verrucosum</i> )   |
| TERG_03734 | -1.84 pre-rRNA processing protein Rrp12 ( <i>T. tonsurans</i> )               |
| TERG_01490 | -1.84 LysR family regulatory protein ( <i>M. gypseum</i> )                    |
| TERG_12252 | -1.85 GTP-binding protein ( <i>T. tonsurans</i> )                             |
| TERG_02914 | -1.85 tRNA (guanine-N(7)-)-methyltransferase                                  |
| TERG_12390 | -1.85 hypothetical protein                                                    |
| TERG_01076 | -1.85 aconitate hydratase, mitochondrial                                      |
| TERG_00922 | -1.85 meiotically up-regulated 65 protein ( <i>T. equinum</i> )               |
| TERG_04893 | -1.85 polyadenylate-binding protein, cytoplasmic and nuclear                  |
| TERG_11948 | -1.85 hypothetical protein                                                    |
| TERG_08655 | -1.86 ADP,ATP carrier protein                                                 |
| TERG_02139 | -1.86 eukaryotic translation initiation factor 3 subunit D                    |
| TERG_08961 | -1.86 hypothetical protein                                                    |
| TERG_11690 | -1.86 protein kinase subdomain-containing protein ( <i>T. tonsurans</i> )     |
| TERG_04002 | -1.86 ribosome assembly protein SQT1 ( <i>T. equinum</i> )                    |
| TERG_07810 | -1.86 phospholipase ( <i>T. tonsurans</i> )                                   |
| TERG_04437 | -1.87 nucleolar protein NOP2 ( <i>T. tonsurans</i> )                          |
| TERG_07171 | -1.87 hypothetical protein                                                    |
| TERG_07125 | -1.87 peptidyl-tRNA hydrolase                                                 |
| TERG_06651 | -1.87 cytochrome P450, putative ( <i>T. verrucosum</i> )                      |
| TERG_00720 | -1.87 60S ribosomal protein L19 ( <i>T. tonsurans</i> )                       |
| TERG_07409 | -1.87 amino acid permease ( <i>T. equinum</i> )                               |
| TERG_00105 | -1.87 40S ribosomal protein S30                                               |
| TERG_04875 | -1.88 monocarboxylate permease ( <i>T. equinum</i> )                          |
| TERG_06917 | -1.88 elongation factor G, mitochondrial                                      |
| TERG_01372 | -1.88 hypothetical protein                                                    |
| TERG_05021 | -1.88 C6 transcription factor, putative ( <i>A. benhamiae</i> )               |
| TERG_05146 | -1.88 protein methyltransferase ( <i>T. tonsurans</i> )                       |
| TERG_04025 | -1.88 hypothetical protein                                                    |
| TERG_07882 | -1.89 myosin type II heavy chain ( <i>T. tonsurans</i> )                      |
| TERG_06522 | -1.89 FMN dependent dehydrogenase, putative ( <i>T. verrucosum</i> )          |
| TERG_06893 | -1.89 aspartyl-tRNA synthetase ( <i>T. tonsurans</i> )                        |
| TERG_02125 | -1.89 hypothetical protein                                                    |



|            |                                                                                  |
|------------|----------------------------------------------------------------------------------|
| TERG_07947 | -1.89 Sas10/Utp3 family protein ( <i>T. tonsurans</i> )                          |
| TERG_03225 | -1.89 betaine aldehyde dehydrogenase, putative ( <i>A. benhamiae</i> )           |
| TERG_04899 | -1.89 ubiquitin-60S ribosomal protein L40                                        |
| TERG_06539 | -1.90 fructosamine-3-kinase ( <i>T. equinum</i> )                                |
| TERG_06026 | -1.90 ribosomal protein S24 ( <i>T. tonsurans</i> )                              |
| TERG_04979 | -1.90 RNA exonuclease 4 ( <i>T. tonsurans</i> )                                  |
| TERG_01494 | -1.90 hypothetical protein                                                       |
| TERG_02921 | -1.90 hypothetical protein                                                       |
| TERG_07362 | -1.90 UV damage endonuclease UvdE                                                |
| TERG_04676 | -1.91 cell division control protein 10 ( <i>T. tonsurans</i> )                   |
| TERG_05039 | -1.91 ribonucleoprotein-associated protein                                       |
| TERG_05342 | -1.91 MFS multidrug transporter, putative ( <i>A. benhamiae</i> )                |
| TERG_02867 | -1.91 ribosome biogenesis ATPase RIX7 ( <i>T. tonsurans</i> )                    |
| TERG_07950 | -1.91 translation elongation factor 1 subunit Eef1-beta ( <i>T. equinum</i> )    |
| TERG_05799 | -1.91 chlorophyll synthesis pathway protein BchC                                 |
| TERG_06796 | -1.91 kinesin family protein ( <i>T. equinum</i> )                               |
| TERG_00962 | -1.91 protein kinase subdomain-containing protein ( <i>T. tonsurans</i> )        |
| TERG_12199 | -1.91 hypothetical protein                                                       |
| TERG_06032 | -1.91 ribosomal small subunit assembly protein, putative ( <i>A. benhamiae</i> ) |
| TERG_07922 | -1.92 glycine cleavage system T protein                                          |
| TERG_03400 | -1.92 subtilisin-like protease 1                                                 |
| TERG_12501 | -1.92 catechol dioxygenase, putative ( <i>T. verrucosum</i> )                    |
| TERG_12294 | -1.92 histidine acid phosphatase, putative ( <i>T. verrucosum</i> )              |
| TERG_12533 | -1.93 hypothetical protein                                                       |
| TERG_06218 | -1.93 60S ribosomal protein L34 ( <i>T. equinum</i> )                            |
| TERG_05278 | -1.93 microtubule associated protein ( <i>T. tonsurans</i> )                     |
| TERG_12120 | -1.93 DNA replication licensing factor mcm5                                      |
| TERG_12491 | -1.93 carboxylesterase, putative ( <i>A. benhamiae</i> )                         |
| TERG_08363 | -1.93 tyrosinase ( <i>T. verrucosum</i> )                                        |
| TERG_04238 | -1.93 H/K ATPase alpha subunit ( <i>T. equinum</i> )                             |
| TERG_02587 | -1.94 hypothetical protein                                                       |
| TERG_07059 | -1.94 hypothetical protein                                                       |
| TERG_08794 | -1.94 pyruvate dehydrogenase kinase ( <i>T. equinum</i> )                        |
| TERG_00708 | -1.94 serine hydroxymethyltransferase ( <i>T. tonsurans</i> )                    |
| TERG_04548 | -1.94 SH3 domain-containing protein cyk3 ( <i>T. equinum</i> )                   |
| TERG_06109 | -1.94 RNA polymerase I subunit Rpa43, putative ( <i>T. verrucosum</i> )          |
| TERG_12511 | -1.95 MFS multidrug transporter ( <i>T. equinum</i> )                            |
| TERG_02672 | -1.95 ATP-dependent RNA helicase has1                                            |
| TERG_11979 | -1.95 cell division control protein 54 ( <i>T. tonsurans</i> )                   |
| TERG_03401 | -1.95 high affinity nickel transporter ( <i>T. tonsurans</i> )                   |
| TERG_12321 | -1.96 hypothetical protein                                                       |
| TERG_06172 | -1.96 60S ribosomal protein L12                                                  |
| TERG_00943 | -1.96 DNA mismatch repair protein msh-2 ( <i>M. canis</i> )                      |
| TERG_08269 | -1.97 polysaccharide deacetylase ( <i>T. tonsurans</i> )                         |
| TERG_07012 | -1.97 rRNA 2'-O-methyltransferase fibrillar                                      |
| TERG_12602 | -1.97 4-coumarate-CoA ligase ( <i>T. equinum</i> )                               |
| TERG_08133 | -1.97 40S ribosomal protein S25                                                  |
| TERG_08990 | -1.97 hypothetical protein                                                       |
| TERG_08375 | -1.97 ATP-dependent RNA helicase eIF4A                                           |

|            |       |                                                                                      |
|------------|-------|--------------------------------------------------------------------------------------|
| TERG_01446 | -1.97 | GMP synthase [glutamine-hydrolyzing]                                                 |
| TERG_12226 | -1.97 | SNF2 family helicase ( <i>T. equinum</i> )                                           |
| TERG_05685 | -1.97 | 60S ribosomal protein L13 ( <i>T. tonsurans</i> )                                    |
| TERG_00679 | -1.97 | AhpC/TSA family protein ( <i>T. equinum</i> )                                        |
| TERG_00550 | -1.98 | hypothetical protein                                                                 |
| TERG_00633 | -1.98 | 40S ribosomal protein S16                                                            |
| TERG_07477 | -1.98 | copper-sulfate regulated protein 1 ( <i>T. equinum</i> )                             |
| TERG_04450 | -1.98 | 60S ribosomal protein L23 ( <i>T. tonsurans</i> )                                    |
| TERG_02640 | -1.98 | pre-rRNA processing protein Utp22 ( <i>T. verrucosum</i> )                           |
| TERG_02759 | -1.98 | hexokinase XprF ( <i>T. equinum</i> )                                                |
| TERG_11645 | -1.99 | Phytanoyl-CoA dioxygenase PhyH ( <i>T. equinum</i> )                                 |
| TERG_12682 | -1.99 | hypothetical protein                                                                 |
| TERG_11558 | -1.99 | hypothetical protein                                                                 |
| TERG_08334 | -2.00 | proline oxidase Put1, putative ( <i>A. benhamiae</i> )                               |
| TERG_05363 | -2.00 | hypothetical protein                                                                 |
| TERG_11685 | -2.00 | hypothetical protein                                                                 |
| TERG_02397 | -2.00 | 60S ribosomal protein L37                                                            |
| TERG_06365 | -2.00 | ribosomal protein L15                                                                |
| TERG_05511 | -2.00 | AT DNA binding protein ( <i>T. equinum</i> )                                         |
| TERG_00531 | -2.00 | 40S ribosomal protein S7                                                             |
| TERG_12259 | -2.00 | CMGC/CLK protein kinase ( <i>T. equinum</i> )                                        |
| TERG_04281 | -2.01 | woronin body major protein                                                           |
| TERG_04043 | -2.01 | hypothetical protein                                                                 |
| TERG_08924 | -2.01 | MIZ zinc finger domain protein ( <i>A. benhamiae</i> )                               |
| TERG_02322 | -2.02 | hypothetical protein                                                                 |
| TERG_05401 | -2.02 | rRNA processing protein Bystin ( <i>T. tonsurans</i> )                               |
| TERG_04924 | -2.02 | threonine aldolase, putative ( <i>T. verrucosum</i> )                                |
| TERG_03672 | -2.02 | hypothetical protein                                                                 |
| TERG_04647 | -2.02 | 60S ribosomal protein L18 ( <i>T. equinum</i> )                                      |
| TERG_07626 | -2.02 | hypothetical protein                                                                 |
| TERG_08545 | -2.02 | C-4 methyl sterol oxidase Erg25 ( <i>T. equinum</i> )                                |
| TERG_01125 | -2.03 | SprT family metallopeptidase, putative ( <i>T. verrucosum</i> )                      |
| TERG_05003 | -2.03 | NmrA family protein ( <i>T. equinum</i> )                                            |
| TERG_08672 | -2.03 | HFR-3 ( <i>M. canis</i> )                                                            |
| TERG_08722 | -2.04 | hypothetical protein                                                                 |
| TERG_04411 | -2.04 | dipeptidase ( <i>T. equinum</i> )                                                    |
| TERG_12263 | -2.05 | hypothetical protein                                                                 |
| TERG_06262 | -2.05 | mitochondrial carrier protein ( <i>T. tonsurans</i> )                                |
| TERG_00881 | -2.05 | zinc-containing alcohol dehydrogenase, putative ( <i>T. verrucosum</i> )             |
| TERG_11906 | -2.06 | FAD binding domain containing protein ( <i>T. equinum</i> )                          |
| TERG_06760 | -2.06 | ATP binding L-PSP endoribonuclease family protein, putative ( <i>T. verrucosum</i> ) |
| TERG_07231 | -2.06 | hemolysin-III family protein ( <i>T. equinum</i> )                                   |
| TERG_02237 | -2.06 | 40S ribosomal protein S28                                                            |
| TERG_04130 | -2.06 | plasma membrane ATPase                                                               |
| TERG_00106 | -2.07 | 60S ribosomal protein L24                                                            |
| TERG_07999 | -2.07 | hypothetical protein                                                                 |
| TERG_12334 | -2.07 | hypothetical protein                                                                 |
| TERG_01952 | -2.07 | 40S ribosomal protein S15                                                            |
| TERG_11646 | -2.07 | hypothetical protein                                                                 |

|            |                                                                                        |
|------------|----------------------------------------------------------------------------------------|
| TERG_07385 | -2.07 60S acidic ribosomal protein P1                                                  |
| TERG_05046 | -2.07 hypothetical protein                                                             |
| TERG_01149 | -2.07 choline dehydrogenase, putative ( <i>T. verrucosum</i> )                         |
| TERG_00738 | -2.08 60S ribosomal protein L44                                                        |
| TERG_06275 | -2.08 40S ribosomal protein                                                            |
| TERG_04478 | -2.08 40S ribosomal protein S1                                                         |
| TERG_00088 | -2.08 beta-xylosidase, putative ( <i>A. benhamiae</i> )                                |
| TERG_03929 | -2.08 hypothetical protein                                                             |
| TERG_01415 | -2.08 ribosomal protein L24                                                            |
| TERG_06846 | -2.08 inosine-5'-monophosphate dehydrogenase                                           |
| TERG_01779 | -2.08 sentrin-specific protease ( <i>T. equinum</i> )                                  |
| TERG_00880 | -2.08 actin filament organization protein App1-like, putative ( <i>T. verrucosum</i> ) |
| TERG_03624 | -2.09 SUN domain protein (Uth1), putative ( <i>T. verrucosum</i> )                     |
| TERG_06261 | -2.09 phosphoesterase ( <i>T. equinum</i> )                                            |
| TERG_08282 | -2.09 hypothetical protein                                                             |
| TERG_07509 | -2.09 serine/threonine protein kinase ( <i>M. canis</i> )                              |
| TERG_02260 | -2.10 hypothetical protein                                                             |
| TERG_06236 | -2.10 40S ribosomal protein S19                                                        |
| TERG_02542 | -2.10 integral membrane protein Pth11-like, putative ( <i>T. verrucosum</i> )          |
| TERG_02861 | -2.10 40S ribosomal protein S23                                                        |
| TERG_11916 | -2.11 nucleolus protein required for cell viability ( <i>T. tonsurans</i> )            |
| TERG_01256 | -2.11 ribosomal protein L14 ( <i>T. tonsurans</i> )                                    |
| TERG_12251 | -2.11 GTP-binding protein ( <i>T. tonsurans</i> )                                      |
| TERG_06815 | -2.11 bZIP transcription factor ( <i>T. tonsurans</i> )                                |
| TERG_04073 | -2.11 glutathione synthetase                                                           |
| TERG_02024 | -2.12 hypothetical protein                                                             |
| TERG_04778 | -2.12 ribosome assembly and transport protein Srp40, putative ( <i>T. verrucosum</i> ) |
| TERG_00491 | -2.12 hypothetical protein                                                             |
| TERG_02631 | -2.12 histone H2B                                                                      |
| TERG_05737 | -2.13 hypothetical protein                                                             |
| TERG_02231 | -2.13 ribosome biogenesis protein ( <i>T. tonsurans</i> )                              |
| TERG_07380 | -2.13 40S ribosomal protein S26E                                                       |
| TERG_03116 | -2.13 zf-PARP-type zinc finger protein ( <i>T. tonsurans</i> )                         |
| TERG_00221 | -2.13 hypothetical protein                                                             |
| TERG_06874 | -2.14 UTP-glucose-1-phosphate uridylyltransferase ( <i>T. tonsurans</i> )              |
| TERG_07726 | -2.14 hypothetical protein                                                             |
| TERG_02545 | -2.14 MFS monocarboxylate transporter ( <i>T. equinum</i> )                            |
| TERG_08821 | -2.14 ribosome biogenesis ( <i>T. equinum</i> )                                        |
| TERG_02385 | -2.14 hypothetical protein                                                             |
| TERG_08047 | -2.14 hypothetical protein                                                             |
| TERG_05236 | -2.14 60S ribosomal protein L35                                                        |
| TERG_06265 | -2.14 LPS glycosyltransferase ( <i>T. equinum</i> )                                    |
| TERG_02611 | -2.14 WD repeat protein ( <i>A. benhamiae</i> )                                        |
| TERG_04740 | -2.15 ergosterol biosynthesis protein Erg28 ( <i>T. tonsurans</i> )                    |
| TERG_06512 | -2.15 hypothetical protein                                                             |
| TERG_06640 | -2.15 phosphoribosylamine-glycine ligase                                               |
| TERG_03880 | -2.15 60S ribosomal protein L5                                                         |
| TERG_02886 | -2.15 hypothetical protein                                                             |
| TERG_01018 | -2.15 monooxygenase, putative ( <i>A. benhamiae</i> )                                  |

|            |                                                                             |
|------------|-----------------------------------------------------------------------------|
| TERG_05801 | -2.15 60S ribosomal protein L15                                             |
| TERG_00650 | -2.15 40S ribosomal protein S17-A                                           |
| TERG_07135 | -2.15 hypothetical protein                                                  |
| TERG_02263 | -2.16 hypothetical protein                                                  |
| TERG_07383 | -2.16 aconitate hydratase, mitochondrial                                    |
| TERG_04506 | -2.16 60S ribosomal protein L4-A ( <i>T. tonsurans</i> )                    |
| TERG_07066 | -2.17 40S ribosomal protein S5                                              |
| TERG_05424 | -2.17 hypothetical protein                                                  |
| TERG_02283 | -2.18 MFS transporter, putative ( <i>T. verrucosum</i> )                    |
| TERG_05723 | -2.18 hypothetical protein                                                  |
| TERG_06221 | -2.18 CTP synthase                                                          |
| TERG_07072 | -2.18 ATP-dependent RNA helicase DRS1                                       |
| TERG_08771 | -2.18 extracellular serine-threonine rich protein ( <i>T. tonsurans</i> )   |
| TERG_05626 | -2.18 chitinase ( <i>T. equinum</i> )                                       |
| TERG_02534 | -2.18 hypothetical protein                                                  |
| TERG_11688 | -2.18 nitrilase ( <i>T. tonsurans</i> )                                     |
| TERG_06421 | -2.18 hypothetical protein                                                  |
| TERG_07154 | -2.18 iron donor protein CyaY                                               |
| TERG_01718 | -2.19 cell division control protein Cdc6 ( <i>T. tonsurans</i> )            |
| TERG_01604 | -2.19 60S ribosomal protein L36                                             |
| TERG_08095 | -2.19 MFS multidrug transporter, putative ( <i>A. benhamiae</i> )           |
| TERG_04040 | -2.19 Spo12 family protein ( <i>T. tonsurans</i> )                          |
| TERG_11551 | -2.19 telomere and ribosome associated protein Stm1 ( <i>T. tonsurans</i> ) |
| TERG_06437 | -2.20 ribosomal protein L28e ( <i>T. equinum</i> )                          |
| TERG_05345 | -2.20 60S ribosomal protein L43                                             |
| TERG_02404 | -2.20 40S ribosomal protein S4                                              |
| TERG_02496 | -2.20 histone H1 ( <i>T. tonsurans</i> )                                    |
| TERG_05625 | -2.20 class V chitinase, putative ( <i>T. verrucosum</i> )                  |
| TERG_08533 | -2.20 poly(A) polymerase Cid1 ( <i>T. equinum</i> )                         |
| TERG_01419 | -2.20 protein pyrABCN                                                       |
| TERG_04310 | -2.20 alcohol dehydrogenase ( <i>T. tonsurans</i> )                         |
| TERG_02895 | -2.21 60S ribosomal protein L9-B ( <i>T. equinum</i> )                      |
| TERG_05283 | -2.21 60S ribosomal protein L32                                             |
| TERG_07493 | -2.21 Zinc knuckle transcription factor (CnjB) ( <i>T. tonsurans</i> )      |
| TERG_02953 | -2.21 hypothetical protein                                                  |
| TERG_07235 | -2.21 fructose-1,6-bisphosphatase ( <i>T. tonsurans</i> )                   |
| TERG_07630 | -2.21 FMN dependent dehydrogenase, putative ( <i>T. verrucosum</i> )        |
| TERG_00242 | -2.22 60S ribosomal protein L27-A ( <i>T. tonsurans</i> )                   |
| TERG_02118 | -2.22 GPI anchored protein, putative ( <i>A. benhamiae</i> )                |
| TERG_03747 | -2.22 phospholipase A2 ( <i>T. equinum</i> )                                |
| TERG_12607 | -2.22 ThiF domain-containing protein ( <i>T. tonsurans</i> )                |
| TERG_12500 | -2.22 sorbitol dehydrogenase ( <i>T. equinum</i> )                          |
| TERG_04576 | -2.22 CRAL/TRIO domain protein ( <i>T. verrucosum</i> )                     |
| TERG_12619 | -2.22 hypothetical protein                                                  |
| TERG_04772 | -2.23 40S ribosomal protein S8-B                                            |
| TERG_01995 | -2.23 hypothetical protein                                                  |
| TERG_08428 | -2.23 hypothetical protein                                                  |
| TERG_07182 | -2.23 40S ribosomal protein S6-B                                            |
| TERG_00383 | -2.24 60S ribosomal protein L16                                             |

|            |                                                                       |
|------------|-----------------------------------------------------------------------|
| TERG_03738 | -2.24 60S ribosomal protein L3                                        |
| TERG_07363 | -2.24 hypothetical protein                                            |
| TERG_02376 | -2.25 60S ribosomal protein ( <i>T. equinum</i> )                     |
| TERG_00103 | -2.25 hypothetical protein                                            |
| TERG_07988 | -2.25 60S ribosomal protein L10a                                      |
| TERG_06626 | -2.25 hypothetical protein                                            |
| TERG_02630 | -2.25 histone H2A                                                     |
| TERG_12027 | -2.25 hypothetical protein                                            |
| TERG_05184 | -2.25 glycine cleavage system H protein                               |
| TERG_06414 | -2.26 DUF1338 domain-containing protein ( <i>T. equinum</i> )         |
| TERG_06475 | -2.26 zinc knuckle domain-containing protein ( <i>T. tonsurans</i> )  |
| TERG_06755 | -2.26 C-8 sterol isomerase (Erg-1), putative ( <i>T. verrucosum</i> ) |
| TERG_01838 | -2.26 LIM domain protein ( <i>A. benhamiae</i> )                      |
| TERG_07944 | -2.26 60S ribosomal protein L6 ( <i>T. equinum</i> )                  |
| TERG_12314 | -2.26 hypothetical protein                                            |
| TERG_03619 | -2.27 transcription factor Tos4 ( <i>T. equinum</i> )                 |
| TERG_05655 | -2.27 AN1 zinc finger protein ( <i>T. equinum</i> )                   |
| TERG_06952 | -2.27 rRNA processing protein Pwp1 ( <i>T. tonsurans</i> )            |
| TERG_04775 | -2.27 beta-N-hexosaminidase, putative ( <i>A. benhamiae</i> )         |
| TERG_07127 | -2.27 homocitrate synthase, mitochondrial                             |
| TERG_11753 | -2.28 MFS transporter ( <i>T. tonsurans</i> )                         |
| TERG_07957 | -2.28 hypothetical protein                                            |
| TERG_05251 | -2.28 phosphoglycerate kinase                                         |
| TERG_01638 | -2.28 hypothetical protein                                            |
| TERG_05866 | -2.28 40S ribosomal protein S2                                        |
| TERG_02971 | -2.28 60S ribosomal protein L35a ( <i>T. equinum</i> )                |
| TERG_01912 | -2.29 MFS transporter ( <i>T. equinum</i> )                           |
| TERG_01953 | -2.29 60S acidic ribosomal protein P2                                 |
| TERG_06824 | -2.30 60S ribosomal protein L23                                       |
| TERG_01336 | -2.30 MFS transporter ( <i>T. equinum</i> )                           |
| TERG_02937 | -2.30 importin beta-4 subunit ( <i>T. tonsurans</i> )                 |
| TERG_07904 | -2.31 tubulin beta chain                                              |
| TERG_07357 | -2.31 hypothetical protein                                            |
| TERG_05825 | -2.31 40S ribosomal protein S11                                       |
| TERG_06101 | -2.31 ribosomal protein P0 ( <i>T. equinum</i> )                      |
| TERG_04089 | -2.32 RfxA protein ( <i>T. equinum</i> )                              |
| TERG_03494 | -2.32 hypothetical protein                                            |
| TERG_08667 | -2.32 hypothetical protein                                            |
| TERG_08843 | -2.32 hypothetical protein                                            |
| TERG_04606 | -2.32 general amino acid permease AGP2 ( <i>T. equinum</i> )          |
| TERG_04441 | -2.33 centromere/microtubule-binding protein CBF5                     |
| TERG_08390 | -2.33 hypothetical protein                                            |
| TERG_01102 | -2.33 60S ribosomal protein L8-B                                      |
| TERG_02197 | -2.33 nitrilase, putative ( <i>T. verrucosum</i> )                    |
| TERG_04036 | -2.34 adenosine kinase ( <i>T. tonsurans</i> )                        |
| TERG_03340 | -2.35 oxidoreductase ( <i>T. equinum</i> )                            |
| TERG_07002 | -2.35 60S ribosomal protein L17                                       |
| TERG_04153 | -2.35 60S ribosome biogenesis protein Brx1 ( <i>T. tonsurans</i> )    |
| TERG_02878 | -2.35 eukaryotic translation initiation factor 3 subunit F            |

|            |                                                                                                 |
|------------|-------------------------------------------------------------------------------------------------|
| TERG_02377 | -2.36 40S ribosomal protein S9                                                                  |
| TERG_03204 | -2.36 60S ribosomal protein L7                                                                  |
| TERG_05544 | -2.36 plk/plk-unclassified protein kinase ( <i>T. tonsurans</i> )                               |
| TERG_08090 | -2.36 plasma membrane iron permease ( <i>T. tonsurans</i> )                                     |
| TERG_01368 | -2.36 Ribosomal protein L7Ae/L30e/S12e/Gadd45 family protein ( <i>T. equinum</i> )              |
| TERG_08254 | -2.37 40S ribosomal protein S18                                                                 |
| TERG_05893 | -2.37 CMGC protein kinase ( <i>T. tonsurans</i> )                                               |
| TERG_07876 | -2.37 hypothetical protein                                                                      |
| TERG_00635 | -2.38 40S ribosomal protein S14                                                                 |
| TERG_00956 | -2.38 extracellular thaumatin domain-containing protein ( <i>T. equinum</i> )                   |
| TERG_12058 | -2.38 transporter smf2 ( <i>T. tonsurans</i> )                                                  |
| TERG_12358 | -2.38 DNA repair protein Rad5 ( <i>T. tonsurans</i> )                                           |
| TERG_05756 | -2.39 calmodulin-binding protein Sha1, putative ( <i>T. verrucosum</i> )                        |
| TERG_07504 | -2.39 sialidase ( <i>T. tonsurans</i> )                                                         |
| TERG_06163 | -2.39 MYB family conidiophore development protein FlbD ( <i>T. equinum</i> )                    |
| TERG_08333 | -2.39 1-pyrroline-5-carboxylate dehydrogenase                                                   |
| TERG_06246 | -2.39 extracellular serine-threonine rich protein ( <i>A. benhamiae</i> )                       |
| TERG_01634 | -2.40 MFS multidrug transporter, putative ( <i>T. verrucosum</i> )                              |
| TERG_00783 | -2.40 guanine nucleotide-binding protein subunit beta-like protein                              |
| TERG_00462 | -2.41 40S ribosomal protein                                                                     |
| TERG_06496 | -2.41 coproporphyrinogen III oxidase ( <i>T. tonsurans</i> )                                    |
| TERG_01066 | -2.42 DNA methyltransferase Dim-2 ( <i>T. equinum</i> )                                         |
| TERG_11751 | -2.42 PCI domain-containing protein ( <i>T. tonsurans</i> )                                     |
| TERG_02604 | -2.42 40S ribosomal protein S20                                                                 |
| TERG_03343 | -2.43 fatty acid desaturase ( <i>T. equinum</i> )                                               |
| TERG_06266 | -2.43 hypothetical protein                                                                      |
| TERG_11740 | -2.44 hypothetical protein                                                                      |
| TERG_06315 | -2.44 integral membrane protein ( <i>A. benhamiae</i> )                                         |
| TERG_12195 | -2.44 developmental regulator flbA ( <i>M. gypseum</i> )                                        |
| TERG_02530 | -2.46 hypothetical protein                                                                      |
| TERG_11945 | -2.46 hypothetical protein                                                                      |
| TERG_00217 | -2.47 ubiquitin-40S ribosomal protein S27a                                                      |
| TERG_02521 | -2.47 60S ribosomal protein L27a                                                                |
| TERG_07029 | -2.47 hypothetical protein                                                                      |
| TERG_11760 | -2.48 HIT finger domain protein, putative ( <i>T. verrucosum</i> )                              |
| TERG_01985 | -2.48 hypothetical protein                                                                      |
| TERG_08108 | -2.48 40S ribosomal protein S22                                                                 |
| TERG_01550 | -2.49 60S ribosomal protein L38 ( <i>T. tonsurans</i> )                                         |
| TERG_02189 | -2.49 tubulin alpha-2 chain                                                                     |
| TERG_12231 | -2.49 DUF221 domain-containing protein ( <i>T. equinum</i> )                                    |
| TERG_05998 | -2.49 chlorophyll synthesis pathway protein BchC                                                |
| TERG_12033 | -2.49 atypical/RIO/RIO1 protein kinase ( <i>T. tonsurans</i> )                                  |
| TERG_03780 | -2.49 pyruvate dehydrogenase dihydrolipoamide acetyltransferase component ( <i>M. gypseum</i> ) |
| TERG_00504 | -2.49 hypothetical protein                                                                      |
| TERG_05788 | -2.50 60S ribosomal protein L18A ( <i>T. tonsurans</i> )                                        |
| TERG_12318 | -2.50 chitin synthase ( <i>T. tonsurans</i> )                                                   |
| TERG_08273 | -2.52 zinc finger protein ZPR1 ( <i>T. tonsurans</i> )                                          |
| TERG_06585 | -2.52 hypothetical protein                                                                      |

|            |       |                                                                                  |
|------------|-------|----------------------------------------------------------------------------------|
| TERG_03758 | -2.52 | hypothetical protein                                                             |
| TERG_07689 | -2.53 | ribosomal biogenesis protein Gar2 ( <i>T. tonsurans</i> )                        |
| TERG_07069 | -2.53 | carbonic anhydrase ( <i>T. tonsurans</i> )                                       |
| TERG_00976 | -2.54 | serine hydroxymethyltransferase, cytosolic                                       |
| TERG_05627 | -2.54 | LysM domain-containing protein ( <i>M. canis</i> )                               |
| TERG_05615 | -2.55 | hsp70-like protein ( <i>T. equinum</i> )                                         |
| TERG_01562 | -2.55 | 60S ribosomal protein L11                                                        |
| TERG_07786 | -2.55 | NAP family protein ( <i>T. equinum</i> )                                         |
| TERG_08353 | -2.55 | cytochrome P450 55A3 ( <i>T. tonsurans</i> )                                     |
| TERG_01609 | -2.56 | Na/K ATPase alpha 1 subunit ( <i>T. equinum</i> )                                |
| TERG_02053 | -2.56 | hypothetical protein                                                             |
| TERG_06234 | -2.56 | 2,5-diketo-D-gluconic acid reductase A ( <i>T. equinum</i> )                     |
| TERG_04855 | -2.56 | hypothetical protein                                                             |
| TERG_05523 | -2.56 | hypothetical protein                                                             |
| TERG_11828 | -2.57 | hypothetical protein                                                             |
| TERG_06055 | -2.57 | NmrA-like family protein ( <i>A. benhamiae</i> )                                 |
| TERG_05202 | -2.58 | MFS drug efflux transporter ( <i>T. equinum</i> )                                |
| TERG_01344 | -2.58 | 60S ribosomal protein L22 ( <i>T. tonsurans</i> )                                |
| TERG_03117 | -2.58 | kinesin family protein ( <i>T. tonsurans</i> )                                   |
| TERG_04308 | -2.59 | MFS sugar transporter ( <i>T. tonsurans</i> )                                    |
| TERG_08179 | -2.59 | tRNA pseudouridine synthase D ( <i>T. equinum</i> )                              |
| TERG_11747 | -2.59 | hypothetical protein                                                             |
| TERG_07209 | -2.60 | GTPase binding protein Rid1 ( <i>M. canis</i> )                                  |
| TERG_11830 | -2.61 | hypothetical protein                                                             |
| TERG_03380 | -2.62 | FK506-binding protein 1A ( <i>T. equinum</i> )                                   |
| TERG_05222 | -2.63 | S-adenosylmethionine synthase                                                    |
| TERG_02166 | -2.63 | oxidoreductase ( <i>T. equinum</i> )                                             |
| TERG_02105 | -2.63 | hypothetical protein                                                             |
| TERG_06847 | -2.63 | Ras GTPase activating protein ( <i>T. tonsurans</i> )                            |
| TERG_07639 | -2.65 | atypical/ABC1/ABC1-B protein kinase ( <i>T. tonsurans</i> )                      |
| TERG_07099 | -2.65 | hypothetical protein                                                             |
| TERG_11550 | -2.66 | telomere and ribosome associated protein Stm1, putative ( <i>T. verrucosum</i> ) |
| TERG_12372 | -2.66 | multidrug resistance protein ( <i>T. tonsurans</i> )                             |
| TERG_05849 | -2.67 | thioredoxin reductase ( <i>T. equinum</i> )                                      |
| TERG_07035 | -2.67 | hypothetical protein                                                             |
| TERG_04187 | -2.68 | hypothetical protein                                                             |
| TERG_06207 | -2.68 | proline oxidase PrnD ( <i>T. verrucosum</i> )                                    |
| TERG_01165 | -2.69 | 40S ribosomal protein S10b ( <i>T. equinum</i> )                                 |
| TERG_01777 | -2.69 | GTP-binding protein rhoC                                                         |
| TERG_04531 | -2.69 | hypothetical protein                                                             |
| TERG_03707 | -2.70 | geranylgeranyl diphosphate synthase, putative ( <i>A. benhamiae</i> )            |
| TERG_04680 | -2.72 | hypothetical protein                                                             |
| TERG_07802 | -2.73 | siderophore biosynthesis acetylase AceI, putative ( <i>T. verrucosum</i> )       |
| TERG_05268 | -2.74 | hypothetical protein                                                             |
| TERG_08029 | -2.74 | HMG box protein, putative ( <i>T. verrucosum</i> )                               |
| TERG_12357 | -2.75 | DNA repair protein Rad5 ( <i>T. tonsurans</i> )                                  |
| TERG_06137 | -2.77 | RNA binding protein ( <i>A. benhamiae</i> )                                      |
| TERG_04700 | -2.77 | hypothetical protein                                                             |
| TERG_06611 | -2.77 | hypothetical protein                                                             |

|            |       |                                                                              |
|------------|-------|------------------------------------------------------------------------------|
| TERG_04320 | -2.78 | hypothetical protein                                                         |
| TERG_12084 | -2.79 | hypothetical protein                                                         |
| TERG_01886 | -2.80 | hypothetical protein                                                         |
| TERG_03921 | -2.83 | hypothetical protein                                                         |
| TERG_07981 | -2.83 | hypothetical protein                                                         |
| TERG_04966 | -2.85 | hypothetical protein                                                         |
| TERG_03004 | -2.86 | 3-methyl-2-oxobutanoate hydroxymethyltransferase                             |
| TERG_07588 | -2.86 | 5-methyltetrahydropteroyltriglutamate-homocysteine S-methyltransferase       |
| TERG_11710 | -2.86 | hypothetical protein                                                         |
| TERG_03148 | -2.89 | molybdenum cofactor sulfurase ( <i>T. equinum</i> )                          |
| TERG_01139 | -2.90 | kinesin family protein ( <i>T. tonsurans</i> )                               |
| TERG_07320 | -2.91 | hypothetical protein                                                         |
| TERG_06784 | -2.91 | transcriptional activator of ethanol catabolism AlcS ( <i>A. benhamiae</i> ) |
| TERG_08200 | -2.94 | hypothetical protein                                                         |
| TERG_00566 | -2.94 | hypothetical protein                                                         |
| TERG_08241 | -2.96 | cell division control protein 14 ( <i>T. tonsurans</i> )                     |
| TERG_04738 | -2.96 | hypothetical protein                                                         |
| TERG_07045 | -2.96 | hypothetical protein                                                         |
| TERG_06403 | -2.97 | HASPIN protein kinase                                                        |
| TERG_07285 | -2.97 | hypothetical protein                                                         |
| TERG_01322 | -2.98 | NEK protein kinase ( <i>T. tonsurans</i> )                                   |
| TERG_06376 | -2.99 | hypothetical protein                                                         |
| TERG_05094 | -2.99 | hypothetical protein                                                         |
| TERG_02528 | -2.99 | ubiE/COQ5 methyltransferase, putative ( <i>T. verrucosum</i> )               |
| TERG_02845 | -3.00 | cercosporin toxin biosynthesis protein ( <i>T. equinum</i> )                 |
| TERG_12159 | -3.01 | hypothetical protein                                                         |
| TERG_06049 | -3.02 | dimethylallyl tryptophan synthase, putative ( <i>T. verrucosum</i> )         |
| TERG_02279 | -3.03 | hypothetical protein                                                         |
| TERG_05419 | -3.04 | glycine dehydrogenase                                                        |
| TERG_08649 | -3.04 | cell division control protein (Cdc15), putative ( <i>A. benhamiae</i> )      |
| TERG_04666 | -3.05 | hypothetical protein                                                         |
| TERG_12566 | -3.05 | hypothetical protein                                                         |
| TERG_07469 | -3.06 | SUN domain-containing protein ( <i>T. equinum</i> )                          |
| TERG_07905 | -3.07 | 1-pyrroline-5-carboxylate dehydrogenase                                      |
| TERG_08479 | -3.09 | kinesin family protein ( <i>T. verrucosum</i> )                              |
| TERG_01659 | -3.10 | heat shock protein Hsp30-like, putative ( <i>A. benhamiae</i> )              |
| TERG_12391 | -3.10 | hypothetical protein                                                         |
| TERG_03217 | -3.11 | hypothetical protein                                                         |
| TERG_00429 | -3.11 | pisatin demethylase ( <i>M. gypseum</i> )                                    |
| TERG_12342 | -3.13 | membrane zinc transporter ( <i>T. tonsurans</i> )                            |
| TERG_12313 | -3.13 | hypothetical protein                                                         |
| TERG_05141 | -3.13 | NCS1 nucleoside transporter ( <i>T. equinum</i> )                            |
| TERG_04374 | -3.18 | STE/STE20/YSK protein kinase                                                 |
| TERG_03671 | -3.18 | hypothetical protein                                                         |
| TERG_03670 | -3.19 | hypothetical protein                                                         |
| TERG_03434 | -3.25 | GTP binding protein ( <i>T. equinum</i> )                                    |
| TERG_06235 | -3.27 | hypothetical protein                                                         |
| TERG_11506 | -3.27 | phosphoenolpyruvate carboxykinase [ATP]                                      |
| TERG_03660 | -3.28 | hypothetical protein                                                         |



|            |                                                                                              |
|------------|----------------------------------------------------------------------------------------------|
| TERG_08091 | -3.31 conidial pigment biosynthesis oxidase Abr1/brown ( <i>T. verrucosum</i> )              |
| TERG_11621 | -3.32 hypothetical protein                                                                   |
| TERG_03060 | -3.36 hypothetical protein                                                                   |
| TERG_04234 | -3.41 hydrophobin, putative ( <i>T. verrucosum</i> )                                         |
| TERG_06646 | -3.42 arrestin ( <i>T. equinum</i> )                                                         |
| TERG_07364 | -3.42 oxidoreductase, zinc-binding dehydrogenase family superfamily ( <i>T. verrucosum</i> ) |
| TERG_04028 | -3.43 cytochrome P450, putative ( <i>T. verrucosum</i> )                                     |
| TERG_06540 | -3.44 glutathione transferase ( <i>T. tonsurans</i> )                                        |
| TERG_01731 | -3.45 hypothetical protein                                                                   |
| TERG_07570 | -3.47 G-protein signaling regulator, putative ( <i>T. verrucosum</i> )                       |
| TERG_07354 | -3.48 hypothetical protein                                                                   |
| TERG_12618 | -3.50 hypothetical protein                                                                   |
| TERG_04530 | -3.54 hypothetical protein                                                                   |
| TERG_03506 | -3.54 hypothetical protein                                                                   |
| TERG_12043 | -3.55 beta-1,6 glucan synthetase ( <i>T. tonsurans</i> )                                     |
| TERG_08985 | -3.56 hypothetical protein                                                                   |
| TERG_04956 | -3.57 hypothetical protein                                                                   |
| TERG_03700 | -3.58 hypothetical protein                                                                   |
| TERG_00241 | -3.59 hypothetical protein                                                                   |
| TERG_08004 | -3.60 hypothetical protein                                                                   |
| TERG_01341 | -3.61 protein-tyrosine phosphatase ( <i>T. equinum</i> )                                     |
| TERG_12017 | -3.68 MFS sugar transporter, putative ( <i>A. benhamiae</i> )                                |
| TERG_08648 | -3.73 cell division control protein (Cdc15), putative ( <i>A. benhamiae</i> )                |
| TERG_01480 | -3.74 MFS multidrug transporter, putative ( <i>A. benhamiae</i> )                            |
| TERG_08054 | -3.75 homoserine acetyltransferase ( <i>T. tonsurans</i> )                                   |
| TERG_00689 | -3.75 AUR protein kinase                                                                     |
| TERG_11505 | -3.77 phosphoenolpyruvate carboxykinase [ATP]                                                |
| TERG_08258 | -3.79 hypothetical protein                                                                   |
| TERG_07083 | -3.80 hypothetical protein                                                                   |
| TERG_00520 | -3.82 hypothetical protein                                                                   |
| TERG_12018 | -3.85 MFS sugar transporter, putative ( <i>A. benhamiae</i> )                                |
| TERG_07665 | -3.86 hypothetical protein                                                                   |
| TERG_11640 | -3.89 hypothetical protein                                                                   |
| TERG_03403 | -3.92 hypothetical protein                                                                   |
| TERG_03493 | -3.94 hypothetical protein                                                                   |
| TERG_08260 | -3.96 subtilisin-like protease 2                                                             |
| TERG_00218 | -3.97 C2H2 transcription factor (Swi5), putative ( <i>A. benhamiae</i> )                     |
| TERG_04263 | -4.01 hypothetical protein                                                                   |
| TERG_05350 | -4.03 hypothetical protein                                                                   |
| TERG_00243 | -4.05 pathogenesis associated protein Cap20, putative ( <i>T. verrucosum</i> )               |
| TERG_01406 | -4.08 phospholipase D ( <i>T. equinum</i> )                                                  |
| TERG_07108 | -4.11 WD-repeat containing protein slp1 ( <i>T. tonsurans</i> )                              |
| TERG_00499 | -4.17 hypothetical protein                                                                   |
| TERG_03936 | -4.19 CAMK protein kinase                                                                    |
| TERG_03105 | -4.39 hypothetical protein                                                                   |
| TERG_02671 | -4.40 hypothetical protein                                                                   |
| TERG_00500 | -4.44 hypothetical protein                                                                   |
| TERG_02278 | -4.60 hypothetical protein                                                                   |
| TERG_08806 | -4.65 hypothetical protein                                                                   |

|            |       |                                                       |
|------------|-------|-------------------------------------------------------|
| TERG_08097 | -4.67 | hypothetical protein                                  |
| TERG_12035 | -4.87 | NB-ARC and TPR domain protein ( <i>A. benhamiae</i> ) |
| TERG_01599 | -4.95 | hypothetical protein                                  |
| TERG_01148 | -5.26 | hypothetical protein                                  |
| TERG_11771 | -5.51 | hypothetical protein                                  |

Gene expression values are expressed in log<sub>2</sub> fold change.

| ID         | 3h    | 12h   | Gene Product Name                                                            |
|------------|-------|-------|------------------------------------------------------------------------------|
| TERG_06548 | 10.86 | 11.80 | hypothetical protein                                                         |
| TERG_01782 | 8.34  | 9.02  | hypothetical protein                                                         |
| TERG_04952 | 6.87  | 7.69  | multidrug resistance protein ( <i>T. equinum</i> )                           |
| TERG_08954 | 6.61  | 5.90  | hypothetical protein                                                         |
| TERG_08751 | 5.82  | 6.33  | ABC multidrug transporter, putative ( <i>A. benhamiae</i> )                  |
| TERG_01543 | 5.42  | 7.48  | s-adenosylmethionine (SAM)-dependent methyltransferase ( <i>M. gypseum</i> ) |
| TERG_08041 | 5.42  | 6.24  | aminotransferase, putative ( <i>A. benhamiae</i> )                           |
| TERG_04937 | 5.41  | 6.40  | alpha/beta hydrolase ( <i>T. equinum</i> )                                   |
| TERG_07830 | 5.41  | 8.22  | hypothetical protein                                                         |
| TERG_11650 | 4.97  | 5.91  | hypothetical protein                                                         |
| TERG_03829 | 4.86  | 6.92  | FAD binding domain-containing protein ( <i>T. equinum</i> )                  |
| TERG_00010 | 4.76  | 8.72  | amidase family protein ( <i>T. verrucosum</i> )                              |
| TERG_06347 | 4.53  | 5.85  | hypothetical protein                                                         |
| TERG_08283 | 4.46  | 2.17  | acetamidase ( <i>T. tonsurans</i> )                                          |
| TERG_01783 | 4.26  | 4.90  | hypothetical protein                                                         |
| TERG_04117 | 4.12  | 5.41  | tannase, putative ( <i>A. benhamiae</i> )                                    |
| TERG_07465 | 3.93  | 3.62  | serine peptidase, family S28, putative ( <i>A. benhamiae</i> )               |
| TERG_05023 | 3.86  | 2.95  | calcium/proton exchanger                                                     |
| TERG_06779 | 3.85  | 4.61  | hypothetical protein                                                         |
| TERG_08195 | 3.74  | 2.54  | peptidase S41 family protein ( <i>M. gypseum</i> )                           |
| TERG_05037 | 3.73  | 4.31  | hypothetical protein                                                         |
| TERG_01280 | 3.73  | 4.55  | IgE-binding protein ( <i>A. benhamiae</i> )                                  |
| TERG_02199 | 3.71  | 2.04  | glutamate carboxypeptidase ( <i>T. equinum</i> )                             |
| TERG_04950 | 3.60  | 4.48  | cytochrome P450 monooxygenase ( <i>T. equinum</i> )                          |
| TERG_05137 | 3.53  | 4.96  | microsomal dipeptidase ( <i>T. tonsurans</i> )                               |
| TERG_04951 | 3.51  | 3.38  | U-box domain-containing protein ( <i>T. equinum</i> )                        |
| TERG_01460 | 3.48  | 3.04  | carboxylesterase ( <i>T. equinum</i> )                                       |
| TERG_02488 | 3.43  | 4.42  | hypothetical protein                                                         |
| TERG_04960 | 3.36  | 1.75  | glutathione S-transferase Ure2-like, putative ( <i>A. benhamiae</i> )        |
| TERG_07408 | 3.34  | 4.18  | acetyltransferase, GNAT family ( <i>A. benhamiae</i> )                       |
| TERG_02814 | 3.30  | 4.98  | hypothetical protein                                                         |
| TERG_06106 | 3.27  | 6.45  | sulfate permease 2 ( <i>T. tonsurans</i> )                                   |
| TERG_12228 | 3.26  | 5.00  | hypothetical protein                                                         |
| TERG_11667 | 3.26  | 3.45  | hypothetical protein                                                         |
| TERG_06466 | 3.26  | 1.93  | hypothetical protein                                                         |
| TERG_07556 | 3.24  | 3.97  | hypothetical protein                                                         |
| TERG_03970 | 3.23  | 5.40  | DUF636 domain-containing protein ( <i>T. equinum</i> )                       |
| TERG_01405 | 3.19  | 2.44  | glutathione S-transferase ( <i>T. equinum</i> )                              |
| TERG_05063 | 3.16  | 4.97  | extracellular serine-rich protein ( <i>T. verrucosum</i> )                   |

|            |      |      |                                                                                        |
|------------|------|------|----------------------------------------------------------------------------------------|
| TERG_04146 | 3.15 | 3.93 | FAD/FMN-containing isoamyl alcohol oxidase MreA-like, putative ( <i>A. benhamiae</i> ) |
| TERG_03024 | 3.15 | 2.52 | hypothetical protein                                                                   |
| TERG_08235 | 3.14 | 3.26 | long chain fatty alcohol oxidase ( <i>T. tonsurans</i> )                               |
| TERG_05698 | 3.12 | 1.50 | transesterase (LovD), putative ( <i>T. verrucosum</i> )                                |
| TERG_05466 | 3.12 | 3.90 | MFS transporter, putative ( <i>T. verrucosum</i> )                                     |
| TERG_12230 | 3.11 | 3.51 | peptidase S41 family protein ( <i>A. benhamiae</i> )                                   |
| TERG_02993 | 3.09 | 4.40 | allergenic cerato-platanin Asp F13 ( <i>T. verrucosum</i> )                            |
| TERG_11731 | 3.05 | 4.19 | zinc/cadmium resistance protein ( <i>T. tonsurans</i> )                                |
| TERG_03963 | 3.05 | 3.20 | mannosyl phosphorylinositol ceramide synthase SUR1 ( <i>T. equinum</i> )               |
| TERG_11633 | 3.03 | 4.50 | hypothetical protein                                                                   |
| TERG_03802 | 3.03 | 4.10 | hypothetical protein                                                                   |
| TERG_00389 | 3.01 | 3.41 | hypothetical protein                                                                   |
| TERG_02384 | 3.00 | 2.77 | hypothetical protein                                                                   |
| TERG_05639 | 3.00 | 2.73 | hypothetical protein                                                                   |
| TERG_12229 | 2.99 | 3.56 | peptidase S41 family protein ( <i>A. benhamiae</i> )                                   |
| TERG_00060 | 2.93 | 3.54 | GPI anchored cell wall protein, putative ( <i>A. benhamiae</i> )                       |
| TERG_01572 | 2.89 | 4.25 | carboxylesterase, putative ( <i>T. verrucosum</i> )                                    |
| TERG_01113 | 2.88 | 3.36 | mitochondrial RNA splicing protein ( <i>T. tonsurans</i> )                             |
| TERG_02589 | 2.84 | 4.78 | formamidase ( <i>T. equinum</i> )                                                      |
| TERG_08787 | 2.84 | 1.60 | aminotransferase ( <i>T. tonsurans</i> )                                               |
| TERG_08700 | 2.83 | 1.79 | DUF895 domain membrane protein ( <i>T. equinum</i> )                                   |
| TERG_04907 | 2.82 | 3.06 | glyoxalase ( <i>T. tonsurans</i> )                                                     |
| TERG_07094 | 2.81 | 3.55 | hypothetical protein                                                                   |
| TERG_02747 | 2.80 | 2.42 | cytochrome P450 alkane hydroxylase ( <i>A. benhamiae</i> )                             |
| TERG_02332 | 2.79 | 3.23 | hypothetical protein                                                                   |
| TERG_02572 | 2.78 | 1.77 | hypothetical protein                                                                   |
| TERG_12215 | 2.78 | 2.87 | hypothetical protein                                                                   |
| TERG_00254 | 2.75 | 1.74 | peroxisomal dehydratase ( <i>T. equinum</i> )                                          |
| TERG_05442 | 2.74 | 1.81 | hypothetical protein                                                                   |
| TERG_11552 | 2.73 | 3.23 | hypothetical protein                                                                   |
| TERG_02532 | 2.72 | 4.90 | C6 transcription factor, putative ( <i>T. verrucosum</i> )                             |
| TERG_12216 | 2.71 | 3.06 | hypothetical protein                                                                   |
| TERG_07487 | 2.69 | 2.84 | hypothetical protein                                                                   |
| TERG_02664 | 2.68 | 2.26 | hypothetical protein                                                                   |
| TERG_00161 | 2.66 | 3.23 | hypothetical protein                                                                   |
| TERG_01943 | 2.66 | 2.71 | 1-aminocyclopropane-1-carboxylate deaminase                                            |
| TERG_05418 | 2.64 | 2.67 | hypothetical protein                                                                   |
| TERG_04942 | 2.63 | 3.29 | hypothetical protein                                                                   |
| TERG_06208 | 2.63 | 3.47 | DUF636 domain-containing protein ( <i>M. gypseum</i> )                                 |
| TERG_04953 | 2.62 | 3.54 | cyclin, putative ( <i>T. verrucosum</i> )                                              |
| TERG_12217 | 2.62 | 2.86 | hypothetical protein                                                                   |
| TERG_06005 | 2.60 | 4.04 | hypothetical protein                                                                   |
| TERG_00244 | 2.59 | 2.42 | stomatin family protein ( <i>T. tonsurans</i> )                                        |
| TERG_03353 | 2.58 | 5.16 | endoglucanase ( <i>T. equinum</i> )                                                    |
| TERG_07788 | 2.58 | 2.73 | lysophospholipase ( <i>T. tonsurans</i> )                                              |
| TERG_06638 | 2.57 | 2.17 | endochitinase ( <i>T. equinum</i> )                                                    |
| TERG_03069 | 2.56 | 1.92 | hypothetical protein                                                                   |
| TERG_05450 | 2.55 | 1.72 | acetyltransferase ( <i>T. tonsurans</i> )                                              |

|            |      |      |                                                                                    |
|------------|------|------|------------------------------------------------------------------------------------|
| TERG_01876 | 2.53 | 4.07 | short-chain dehydrogenase/reductase SDR ( <i>T. tonsurans</i> )                    |
| TERG_07326 | 2.53 | 3.30 | glutathione S-transferase PARB ( <i>T. equinum</i> )                               |
| TERG_01467 | 2.53 | 4.44 | cytochrome P450 monooxygenase, putative ( <i>A. benhamiae</i> )                    |
| TERG_00013 | 2.53 | 2.98 | ThiJ/PfpI family protein ( <i>A. benhamiae</i> )                                   |
| TERG_08539 | 2.51 | 4.42 | Diacylglycerol kinase domain-containing protein ( <i>T. equinum</i> )              |
| TERG_03055 | 2.51 | 2.25 | MFS transporter, putative ( <i>T. verrucosum</i> )                                 |
| TERG_07755 | 2.50 | 3.15 | ergot alkaloid biosynthetic protein A ( <i>T. verrucosum</i> )                     |
| TERG_00402 | 2.49 | 3.00 | ABC multidrug transporter, putative ( <i>T. verrucosum</i> )                       |
| TERG_07796 | 2.48 | 1.68 | oxidoreductase, short-chain dehydrogenase/reductase family ( <i>A. benhamiae</i> ) |
| TERG_08077 | 2.47 | 2.90 | hypothetical protein                                                               |
| TERG_12291 | 2.46 | 3.27 | mitochondrial cytochrome b2 ( <i>T. tonsurans</i> )                                |
| TERG_02989 | 2.45 | 2.35 | cytochrome P450 oxidoreductase, putative ( <i>T. verrucosum</i> )                  |
| TERG_03322 | 2.44 | 2.79 | hypothetical protein                                                               |
| TERG_12290 | 2.44 | 3.22 | mitochondrial cytochrome b2 ( <i>T. tonsurans</i> )                                |
| TERG_02555 | 2.43 | 2.55 | DUF636 domain containing protein ( <i>T. equinum</i> )                             |
| TERG_12600 | 2.41 | 3.21 | U3 small nucleolar ribonucleoprotein IMP4 ( <i>T. tonsurans</i> )                  |
| TERG_03907 | 2.39 | 4.54 | neutral amino acid permease ( <i>T. tonsurans</i> )                                |
| TERG_00583 | 2.39 | 1.96 | hypothetical protein                                                               |
| TERG_03027 | 2.35 | 2.06 | hypothetical protein                                                               |
| TERG_12172 | 2.33 | 1.53 | glycerol-3-phosphate dehydrogenase ( <i>T. equinum</i> )                           |
| TERG_01934 | 2.33 | 2.69 | C2H2 finger domain-containing protein ( <i>T. equinum</i> )                        |
| TERG_05518 | 2.32 | 2.32 | oxidoreductase, short chain dehydrogenase/reductase family ( <i>A. benhamiae</i> ) |
| TERG_00199 | 2.32 | 2.61 | serine/threonine protein kinase                                                    |
| TERG_04224 | 2.32 | 3.96 | ABC transporter                                                                    |
| TERG_04399 | 2.31 | 1.81 | MFS transporter, putative ( <i>A. benhamiae</i> )                                  |
| TERG_00162 | 2.30 | 2.26 | MFS multidrug transporter, putative ( <i>A. benhamiae</i> )                        |
| TERG_04521 | 2.30 | 3.15 | HypA-like protein, putative ( <i>A. benhamiae</i> )                                |
| TERG_08779 | 2.29 | 1.84 | hypothetical protein                                                               |
| TERG_03390 | 2.28 | 2.10 | glutathione S-transferase ( <i>T. equinum</i> )                                    |
| TERG_04936 | 2.28 | 2.66 | meiotic chromosome segregation protein ( <i>T. equinum</i> )                       |
| TERG_03255 | 2.27 | 2.72 | hypothetical protein                                                               |
| TERG_02838 | 2.24 | 2.22 | hypothetical protein                                                               |
| TERG_02012 | 2.23 | 2.25 | adenosine deaminase family protein ( <i>A. benhamiae</i> )                         |
| TERG_02210 | 2.22 | 2.73 | hypothetical protein                                                               |
| TERG_05669 | 2.22 | 3.29 | homeobox transcription factor, putative ( <i>T. verrucosum</i> )                   |
| TERG_03230 | 2.21 | 3.14 | hypothetical protein                                                               |
| TERG_05199 | 2.20 | 2.70 | MFS gliotoxin efflux transporter GliA ( <i>T. verrucosum</i> )                     |
| TERG_04118 | 2.20 | 2.59 | hypothetical protein                                                               |
| TERG_08229 | 2.20 | 2.82 | hypothetical protein                                                               |
| TERG_04837 | 2.19 | 2.26 | thioesterase ( <i>T. equinum</i> )                                                 |
| TERG_06927 | 2.19 | 2.02 | hypothetical protein                                                               |
| TERG_12368 | 2.18 | 3.73 | hypothetical protein                                                               |
| TERG_11577 | 2.17 | 1.94 | cysteinyl-tRNA synthetase ( <i>M. gypseum</i> )                                    |
| TERG_06507 | 2.17 | 2.24 | oxidoreductase, 2OG-Fe(II) oxygenase family ( <i>T. verrucosum</i> )               |
| TERG_02610 | 2.16 | 2.12 | WD repeat protein ( <i>T. verrucosum</i> )                                         |
| TERG_12065 | 2.16 | 4.89 | hypothetical protein                                                               |
| TERG_05091 | 2.16 | 2.16 | DUF636 domain-containing protein ( <i>T. equinum</i> )                             |
| TERG_01042 | 2.14 | 2.91 | C6 transcription factor, putative ( <i>T. verrucosum</i> )                         |
| TERG_02520 | 2.13 | 2.17 | DNA helicase ( <i>T. equinum</i> )                                                 |

|            |      |      |                                                                             |
|------------|------|------|-----------------------------------------------------------------------------|
| TERG_11570 | 2.12 | 3.31 | hypothetical protein                                                        |
| TERG_02212 | 2.12 | 2.79 | short chain dehydrogenase/reductase family protein ( <i>T. verrucosum</i> ) |
| TERG_08360 | 2.12 | 4.15 | metallo-beta-lactamase superfamily protein ( <i>T. equinum</i> )            |
| TERG_01956 | 2.12 | 3.61 | C2H2 finger domain protein, putative ( <i>A. benhamiae</i> )                |
| TERG_06407 | 2.11 | 1.95 | protein kinase subdomain-containing protein ( <i>M. canis</i> )             |
| TERG_02899 | 2.11 | 3.50 | hypothetical protein                                                        |
| TERG_02566 | 2.10 | 2.93 | hypothetical protein                                                        |
| TERG_06547 | 2.07 | 2.90 | glycerophosphoryl diester phosphodiesterase ( <i>T. tonsurans</i> )         |
| TERG_00955 | 2.07 | 1.62 | ABC drug exporter AtrF ( <i>T. verrucosum</i> )                             |
| TERG_11801 | 2.06 | 1.70 | serine/threonine protein kinase ( <i>T. equinum</i> )                       |
| TERG_07134 | 2.05 | 2.67 | serine/threonine protein kinase                                             |
| TERG_03785 | 2.04 | 2.77 | isochorismatase family hydrolase, putative ( <i>T. verrucosum</i> )         |
| TERG_06690 | 2.04 | 3.80 | RTA1 domain protein, putative ( <i>A. benhamiae</i> )                       |
| TERG_06990 | 2.04 | 2.81 | hypothetical protein                                                        |
| TERG_08756 | 2.04 | 1.94 | cercosporin toxin biosynthesis protein ( <i>T. equinum</i> )                |
| TERG_08300 | 2.03 | 3.95 | branched-chain amino acid aminotransferase                                  |
| TERG_12158 | 2.02 | 2.65 | hypothetical protein                                                        |
| TERG_02062 | 2.02 | 1.98 | hypothetical protein                                                        |
| TERG_05551 | 2.01 | 3.61 | hypothetical protein                                                        |
| TERG_07428 | 2.00 | 1.73 | C6 transcription factor (UaY), putative ( <i>T. verrucosum</i> )            |
| TERG_02116 | 2.00 | 2.96 | PX domain-containing protein ( <i>T. tonsurans</i> )                        |
| TERG_04696 | 2.00 | 1.72 | MHYT domain signaling protein, putative ( <i>T. verrucosum</i> )            |
| TERG_01077 | 2.00 | 1.79 | metallo-beta-lactamase domain-containing protein ( <i>T. equinum</i> )      |
| TERG_05497 | 1.99 | 2.77 | C6 zinc finger domain-containing protein ( <i>T. equinum</i> )              |
| TERG_08298 | 1.99 | 3.14 | RTA1 domain-containing protein ( <i>T. equinum</i> )                        |
| TERG_02728 | 1.99 | 2.05 | 3-hydroxyisobutyrate dehydrogenase                                          |
| TERG_00616 | 1.98 | 5.04 | potassium/sodium efflux P-type ATPase, fungal-type                          |
| TERG_01172 | 1.98 | 2.37 | hypothetical protein                                                        |
| TERG_04356 | 1.97 | 2.20 | amino acid permease, putative ( <i>A. benhamiae</i> )                       |
| TERG_11861 | 1.97 | 2.07 | DNA repair helicase (rad3) ( <i>T. tonsurans</i> )                          |
| TERG_02661 | 1.96 | 1.86 | hypothetical protein                                                        |
| TERG_03253 | 1.96 | 3.57 | hypothetical protein                                                        |
| TERG_12064 | 1.96 | 4.56 | hypothetical protein                                                        |
| TERG_05104 | 1.96 | 1.67 | MFS transporter of unknown specificity ( <i>T. verrucosum</i> )             |
| TERG_08299 | 1.96 | 3.30 | multidrug resistance-associated protein 1 transporter ( <i>M. canis</i> )   |
| TERG_04509 | 1.94 | 3.55 | hypothetical protein                                                        |
| TERG_05556 | 1.94 | 1.73 | hypothetical protein                                                        |
| TERG_02635 | 1.94 | 3.83 | hypothetical protein                                                        |
| TERG_12286 | 1.94 | 2.06 | hypothetical protein                                                        |
| TERG_07787 | 1.94 | 2.28 | nitrogen metabolite repression protein nmrA                                 |
| TERG_04695 | 1.94 | 1.75 | hypothetical protein                                                        |
| TERG_07198 | 1.92 | 1.92 | DNA polymerase iota ( <i>T. tonsurans</i> )                                 |
| TERG_08050 | 1.92 | 2.16 | acetamidase ( <i>T. equinum</i> )                                           |
| TERG_01919 | 1.92 | 2.96 | serine/threonine protein kinase                                             |
| TERG_02447 | 1.92 | 3.39 | sulfate adenyltransferase                                                   |
| TERG_04034 | 1.92 | 2.86 | hypothetical protein                                                        |
| TERG_00914 | 1.92 | 2.71 | hypothetical protein                                                        |
| TERG_11804 | 1.92 | 2.05 | hypothetical protein                                                        |
| TERG_03229 | 1.92 | 1.65 | hexokinase ( <i>T. tonsurans</i> )                                          |

|            |      |      |                                                                        |
|------------|------|------|------------------------------------------------------------------------|
| TERG_02186 | 1.91 | 3.47 | ABC multidrug transporter, putative ( <i>A. benhamiae</i> )            |
| TERG_02704 | 1.91 | 2.68 | short-chain dehydrogenase/reductase, putative ( <i>A. benhamiae</i> )  |
| TERG_06369 | 1.90 | 2.40 | PQ loop repeat protein ( <i>A. benhamiae</i> )                         |
| TERG_02112 | 1.90 | 2.69 | hypothetical protein                                                   |
| TERG_01594 | 1.88 | 2.35 | hypothetical protein                                                   |
| TERG_02449 | 1.88 | 3.75 | phosphoadenosine phosphosulfate reductase                              |
| TERG_05492 | 1.87 | 2.39 | hypothetical protein                                                   |
| TERG_05134 | 1.87 | 2.35 | O-methyltransferase GliM ( <i>A. benhamiae</i> )                       |
| TERG_11782 | 1.87 | 3.36 | hypothetical protein                                                   |
| TERG_00574 | 1.86 | 3.07 | MFS multidrug transporter, putative ( <i>T. verrucosum</i> )           |
| TERG_00127 | 1.86 | 2.81 | secretory phospholipase A2 ( <i>T. tonsurans</i> )                     |
| TERG_04763 | 1.85 | 2.01 | fructosyl amine:oxygen oxidoreductase ( <i>T. tonsurans</i> )          |
| TERG_07847 | 1.85 | 3.04 | hypothetical protein                                                   |
| TERG_12083 | 1.85 | 2.21 | hypothetical protein                                                   |
| TERG_01964 | 1.85 | 1.60 | cystathionine gamma-lyase ( <i>T. equinum</i> )                        |
| TERG_11832 | 1.84 | 4.18 | cytosolic Fe-S cluster assembling factor NBP35 ( <i>T. tonsurans</i> ) |
| TERG_07647 | 1.83 | 1.55 | hypothetical protein                                                   |
| TERG_12287 | 1.83 | 2.27 | hypothetical protein                                                   |
| TERG_05456 | 1.83 | 2.28 | hypothetical protein                                                   |
| TERG_02311 | 1.83 | 2.92 | hypothetical protein                                                   |
| TERG_04174 | 1.83 | 1.81 | citrinin biosynthesis oxydoreductase CtnB ( <i>T. equinum</i> )        |
| TERG_12066 | 1.82 | 2.01 | AMP-binding enzyme, putative ( <i>T. verrucosum</i> )                  |
| TERG_06004 | 1.82 | 2.61 | hypothetical protein                                                   |
| TERG_01986 | 1.81 | 3.40 | Fe-S protein assembly co-chaperone HscB                                |
| TERG_03771 | 1.80 | 2.47 | ankyrin repeat protein ( <i>T. verrucosum</i> )                        |
| TERG_12654 | 1.79 | 2.16 | hypothetical protein                                                   |
| TERG_08503 | 1.79 | 2.51 | secalin ( <i>M. canis</i> )                                            |
| TERG_00523 | 1.78 | 3.29 | hypothetical protein                                                   |
| TERG_03892 | 1.78 | 1.62 | CAMK/CAMKL protein kinase ( <i>T. tonsurans</i> )                      |
| TERG_03815 | 1.78 | 1.75 | subtilisin-like protease 3                                             |
| TERG_01925 | 1.77 | 3.53 | hypothetical protein                                                   |
| TERG_02565 | 1.77 | 1.82 | sulfate transporter ( <i>T. equinum</i> )                              |
| TERG_12583 | 1.76 | 2.34 | hypothetical protein                                                   |
| TERG_12044 | 1.75 | 2.90 | hypothetical protein                                                   |
| TERG_08568 | 1.75 | 2.47 | CMGC/SRPK protein kinase                                               |
| TERG_11792 | 1.75 | 1.72 | hypothetical protein                                                   |
| TERG_06377 | 1.75 | 1.63 | metalloproteinase, putative ( <i>A. benhamiae</i> )                    |
| TERG_02920 | 1.75 | 2.98 | RTA1 domain-containing protein ( <i>T. equinum</i> )                   |
| TERG_05459 | 1.74 | 2.89 | hypothetical protein                                                   |
| TERG_05824 | 1.74 | 2.46 | hypothetical protein                                                   |
| TERG_03331 | 1.72 | 1.75 | F-box protein ( <i>T. equinum</i> )                                    |
| TERG_03333 | 1.72 | 2.26 | transcription factor RfeD, putative ( <i>A. benhamiae</i> )            |
| TERG_08181 | 1.72 | 2.14 | hypothetical protein                                                   |
| TERG_07859 | 1.72 | 3.02 | ubiquitin C-terminal hydrolase L3 ( <i>T. tonsurans</i> )              |
| TERG_01319 | 1.71 | 2.68 | hypothetical protein                                                   |
| TERG_12213 | 1.71 | 1.59 | hypothetical protein                                                   |
| TERG_01468 | 1.71 | 1.60 | hypothetical protein                                                   |
| TERG_12385 | 1.71 | 3.03 | hypothetical protein                                                   |
| TERG_03312 | 1.70 | 3.03 | RTA1 domain protein, putative ( <i>A. benhamiae</i> )                  |

|            |      |       |                                                                                |
|------------|------|-------|--------------------------------------------------------------------------------|
| TERG_08286 | 1.70 | 1.53  | GPI anchored CFEM domain protein ( <i>T. verrucosum</i> )                      |
| TERG_02593 | 1.69 | 2.21  | C2H2 finger domain protein, putative ( <i>T. verrucosum</i> )                  |
| TERG_00528 | 1.69 | 1.75  | hypothetical protein                                                           |
| TERG_04769 | 1.69 | 1.85  | extracellular serine carboxypeptidase, putative ( <i>T. verrucosum</i> )       |
| TERG_08654 | 1.69 | 1.84  | hypothetical protein                                                           |
| TERG_04766 | 1.67 | 2.07  | calcium/proton exchanger                                                       |
| TERG_06792 | 1.67 | 1.88  | hypothetical protein                                                           |
| TERG_12099 | 1.66 | 2.38  | hypothetical protein                                                           |
| TERG_08451 | 1.65 | 1.51  | hypothetical protein                                                           |
| TERG_01459 | 1.64 | 2.60  | conserved leucine-rich repeat protein ( <i>T. verrucosum</i> )                 |
| TERG_05198 | 1.64 | 1.67  | hypothetical protein                                                           |
| TERG_03240 | 1.64 | 1.70  | transmembrane efflux protein ( <i>T. tonsurans</i> )                           |
| TERG_12067 | 1.63 | 1.97  | AMP-binding enzyme, putative ( <i>T. verrucosum</i> )                          |
| TERG_12327 | 1.63 | 3.18  | alkaline serine protease (PR1)/allergen F18, putative ( <i>T. verrucosum</i> ) |
| TERG_03291 | 1.63 | 4.41  | SNF2 family helicase, putative ( <i>T. verrucosum</i> )                        |
| TERG_11949 | 1.63 | 2.65  | hypothetical protein                                                           |
| TERG_06105 | 1.63 | 2.66  | hypothetical protein                                                           |
| TERG_12320 | 1.62 | 1.83  | hypothetical protein                                                           |
| TERG_01636 | 1.62 | 2.54  | ADP-ribosylglycohydrolase ( <i>M. gypseum</i> )                                |
| TERG_08178 | 1.62 | 2.14  | endoglucanase ( <i>T. equinum</i> )                                            |
| TERG_03078 | 1.61 | 1.77  | cytochrome P450 oxidoreductase OrdA-like, putative ( <i>T. verrucosum</i> )    |
| TERG_06740 | 1.61 | 2.48  | hypothetical protein                                                           |
| TERG_04504 | 1.61 | 3.97  | extracellular protein ( <i>T. equinum</i> )                                    |
| TERG_05421 | 1.60 | 2.11  | alpha-galactosidase A ( <i>M. canis</i> )                                      |
| TERG_08351 | 1.60 | 2.50  | hypothetical protein                                                           |
| TERG_12591 | 1.59 | 2.88  | peptidase S8 family protein ( <i>T. equinum</i> )                              |
| TERG_01637 | 1.59 | 3.74  | hypothetical protein                                                           |
| TERG_07964 | 1.59 | 2.20  | vacuolar endopolyphosphatase, putative ( <i>T. verrucosum</i> )                |
| TERG_03330 | 1.59 | 1.84  | hypothetical protein                                                           |
| TERG_08781 | 1.59 | 1.97  | hypothetical protein                                                           |
| TERG_02847 | 1.59 | 1.95  | Fasciclin domain family protein ( <i>T. verrucosum</i> )                       |
| TERG_02995 | 1.58 | 2.27  | hypothetical protein                                                           |
| TERG_08825 | 1.58 | 1.93  | bZIP transcription factor JlbA/IDI-4 ( <i>T. verrucosum</i> )                  |
| TERG_01082 | 1.57 | 1.66  | hypothetical protein                                                           |
| TERG_04194 | 1.57 | 2.99  | acyltransferase ( <i>T. tonsurans</i> )                                        |
| TERG_01266 | 1.57 | 2.26  | amidophosphoribosyltransferase                                                 |
| TERG_02794 | 1.57 | 2.46  | hypothetical protein                                                           |
| TERG_08324 | 1.56 | 1.88  | hypothetical protein                                                           |
| TERG_02147 | 1.56 | 2.36  | 3-demethylubiquinone-9 3-methyltransferase, putative ( <i>T. verrucosum</i> )  |
| TERG_07443 | 1.56 | 2.17  | hypothetical protein                                                           |
| TERG_02059 | 1.55 | 1.74  | AbpA protein ( <i>T. equinum</i> )                                             |
| TERG_12032 | 1.55 | 2.36  | hypothetical protein                                                           |
| TERG_02848 | 1.55 | 1.54  | short chain dehydrogenase/reductase family protein ( <i>A. benhamiae</i> )     |
| TERG_03884 | 1.55 | -2.04 | hypothetical protein                                                           |
| TERG_06065 | 1.55 | 4.07  | conserved glycine-rich protein ( <i>T. verrucosum</i> )                        |
| TERG_07095 | 1.55 | 1.90  | hypothetical protein                                                           |
| TERG_04954 | 1.55 | 4.09  | hypothetical protein                                                           |
| TERG_00575 | 1.54 | 1.61  | F-box domain protein ( <i>T. verrucosum</i> )                                  |
| TERG_01623 | 1.54 | 2.98  | MFS transporter ( <i>T. equinum</i> )                                          |

|            |       |       |                                                                                    |
|------------|-------|-------|------------------------------------------------------------------------------------|
| TERG_02900 | 1.53  | 3.12  | hypothetical protein                                                               |
| TERG_06650 | 1.53  | 1.63  | MFS monocarboxylate transporter, putative ( <i>A. benhamiae</i> )                  |
| TERG_06147 | 1.53  | 1.50  | pyridine nucleotide-disulfide oxidoreductase, putative ( <i>A. benhamiae</i> )     |
| TERG_07352 | 1.53  | 4.12  | aldehyde reductase (AKR1), putative ( <i>T. verrucosum</i> )                       |
| TERG_00384 | 1.52  | 1.58  | Ser/Thr protein phosphatase family protein ( <i>A. benhamiae</i> )                 |
| TERG_12640 | 1.52  | 2.29  | choriogenin Hminor ( <i>M. canis</i> )                                             |
| TERG_02185 | 1.52  | 1.99  | hypothetical protein                                                               |
| TERG_04245 | 1.52  | 1.73  | hypothetical protein                                                               |
| TERG_12002 | 1.51  | 1.61  | hypothetical protein                                                               |
| TERG_01895 | 1.51  | 2.33  | pheromone processing carboxypeptidase (Sxa2), putative ( <i>T. verrucosum</i> )    |
| TERG_07197 | 1.50  | 3.02  | disintegrin and metalloproteinase domain-containing protein B                      |
| TERG_05303 | 1.50  | 1.88  | phospholipase PldA, putative ( <i>T. verrucosum</i> )                              |
| TERG_05374 | 1.50  | 2.35  | hypothetical protein                                                               |
| TERG_02489 | 1.50  | 2.02  | sister chromatid cohesion acetyltransferase Eco1, putative ( <i>A. benhamiae</i> ) |
| TERG_11724 | -1.51 | -3.66 | polyketide synthase, putative ( <i>A. benhamiae</i> )                              |
| TERG_04742 | -1.52 | -5.29 | hypothetical protein                                                               |
| TERG_06187 | -1.52 | -1.84 | nucleolar ATPase Kre33 ( <i>T. tonsurans</i> )                                     |
| TERG_00507 | -1.53 | -3.57 | hypothetical protein                                                               |
| TERG_12319 | -1.53 | -2.81 | chitin synthase 2                                                                  |
| TERG_02327 | -1.53 | -2.63 | rRNA biogenesis protein RRP5 ( <i>T. tonsurans</i> )                               |
| TERG_00569 | -1.55 | -3.66 | C2H2 finger domain protein, putative ( <i>A. benhamiae</i> )                       |
| TERG_03278 | -1.55 | -2.57 | hypothetical protein                                                               |
| TERG_02425 | -1.55 | -2.44 | RNA binding protein ( <i>A. benhamiae</i> )                                        |
| TERG_01012 | -1.56 | -2.03 | hypothetical protein                                                               |
| TERG_00342 | -1.56 | -2.02 | phosphoglucomutase                                                                 |
| TERG_04791 | -1.56 | -1.58 | hypothetical protein                                                               |
| TERG_04558 | -1.57 | -2.48 | nucleoside diphosphate kinase                                                      |
| TERG_05819 | -1.57 | -1.99 | isocitrate dehydrogenase ( <i>T. tonsurans</i> )                                   |
| TERG_11986 | -1.58 | -3.34 | GABA permease, putative ( <i>A. benhamiae</i> )                                    |
| TERG_02623 | -1.61 | -3.91 | hypothetical protein                                                               |
| TERG_11987 | -1.61 | -3.90 | GABA permease, putative ( <i>A. benhamiae</i> )                                    |
| TERG_01883 | -1.61 | -3.23 | hsp75-like protein                                                                 |
| TERG_05717 | -1.61 | -3.10 | squalene epoxidase ( <i>T. equinum</i> )                                           |
| TERG_04857 | -1.61 | -2.85 | ribose 5-phosphate isomerase                                                       |
| TERG_11689 | -1.63 | -1.97 | U3 small nucleolar RNA-associated protein 10 ( <i>T. equinum</i> )                 |
| TERG_01911 | -1.64 | -3.59 | NmrA family protein ( <i>T. equinum</i> )                                          |
| TERG_07048 | -1.65 | -2.42 | dsDNA-dependent ATPase ( <i>T. equinum</i> )                                       |
| TERG_00189 | -1.65 | -2.87 | 40S ribosomal protein S0                                                           |
| TERG_01202 | -1.68 | -2.11 | histone H3-like centromeric protein cnp1                                           |
| TERG_04041 | -1.69 | -2.21 | Sad1/UNC domain protein ( <i>T. verrucosum</i> )                                   |
| TERG_05435 | -1.70 | -1.62 | hypothetical protein                                                               |
| TERG_07351 | -1.71 | -2.81 | hypothetical protein                                                               |
| TERG_00760 | -1.71 | -3.40 | protein arginine methyltransferase ( <i>T. tonsurans</i> )                         |
| TERG_08139 | -1.71 | -2.67 | NAD dependent epimerase/dehydratase ( <i>M. gypseum</i> )                          |
| TERG_02353 | -1.73 | -3.00 | UbiD family decarboxylase, putative ( <i>T. verrucosum</i> )                       |
| TERG_01002 | -1.74 | -1.89 | chaperone dnaK ( <i>T. tonsurans</i> )                                             |
| TERG_00253 | -1.74 | -2.77 | HNRNP arginine N-methyltransferase ( <i>T. tonsurans</i> )                         |
| TERG_12232 | -1.75 | -2.69 | DUF221 domain-containing protein ( <i>T. equinum</i> )                             |
| TERG_03175 | -1.75 | -3.97 | DUF833 domain protein ( <i>A. benhamiae</i> )                                      |



|            |       |       |                                                                                |
|------------|-------|-------|--------------------------------------------------------------------------------|
| TERG_00657 | -1.77 | -2.38 | hypothetical protein                                                           |
| TERG_08680 | -1.77 | -2.05 | amino acid permease ( <i>T. tonsurans</i> )                                    |
| TERG_00694 | -1.77 | -3.65 | glutamate 5-kinase                                                             |
| TERG_05780 | -1.78 | -2.25 | hypothetical protein                                                           |
| TERG_07200 | -1.78 | -2.48 | C2 domain-containing protein ( <i>T. tonsurans</i> )                           |
| TERG_11785 | -1.78 | -1.83 | hypothetical protein                                                           |
| TERG_01252 | -1.78 | -3.32 | catalase A                                                                     |
| TERG_01062 | -1.78 | -3.08 | hypothetical protein                                                           |
| TERG_11852 | -1.80 | -2.22 | glyoxalase family protein ( <i>T. verrucosum</i> )                             |
| TERG_02114 | -1.83 | -4.27 | glycerol dehydrogenase ( <i>T. tonsurans</i> )                                 |
| TERG_12193 | -1.84 | -2.38 | MFS sugar transporter ( <i>T. equinum</i> )                                    |
| TERG_12156 | -1.87 | -3.31 | hypothetical protein                                                           |
| TERG_05585 | -1.94 | -2.99 | short-chain dehydrogenase/reductase SDR ( <i>T. equinum</i> )                  |
| TERG_01273 | -1.97 | -3.29 | alpha-1,2-mannosidase, putative subfamily ( <i>T. verrucosum</i> )             |
| TERG_00567 | -1.98 | -2.76 | hypothetical protein                                                           |
| TERG_12194 | -2.01 | -2.53 | MFS monosaccharide transporter, putative ( <i>T. verrucosum</i> )              |
| TERG_05808 | -2.02 | -3.25 | hypothetical protein                                                           |
| TERG_02081 | -2.03 | -3.19 | RNA binding protein                                                            |
| TERG_11963 | -2.06 | -4.79 | hypothetical protein                                                           |
| TERG_00855 | -2.08 | -3.48 | aromatic amino acid aminotransferase, putative ( <i>A. benhamiae</i> )         |
| TERG_00852 | -2.08 | -3.99 | Phytanoyl-CoA dioxygenase PhyH ( <i>T. equinum</i> )                           |
| TERG_11536 | -2.09 | -5.69 | hypothetical protein                                                           |
| TERG_12038 | -2.21 | -2.85 | protein phosphatase regulatory subunit Gac1, putative ( <i>T. verrucosum</i> ) |
| TERG_07652 | -2.22 | -2.16 | Delta(12) fatty acid desaturase ( <i>T. equinum</i> )                          |
| TERG_05139 | -2.24 | -2.13 | non ribosomal peptide synthase ( <i>T. equinum</i> )                           |
| TERG_02357 | -2.24 | -2.32 | amino acid permease ( <i>T. equinum</i> )                                      |
| TERG_06715 | -2.27 | -2.79 | LEA domain protein ( <i>A. benhamiae</i> )                                     |
| TERG_04282 | -2.35 | -4.76 | GPI ethanolamine phosphate transferase ( <i>T. tonsurans</i> )                 |
| TERG_03919 | -2.51 | -5.20 | phytoene dehydrogenase ( <i>T. equinum</i> )                                   |
| TERG_00856 | -2.54 | -2.86 | phytanoyl-CoA dioxygenase ( <i>T. equinum</i> )                                |
| TERG_03677 | -2.57 | -3.11 | protein phosphatase regulatory subunit Gac1, putative ( <i>T. verrucosum</i> ) |
| TERG_01917 | -2.60 | -2.32 | O-methyltransferase, putative ( <i>A. benhamiae</i> )                          |
| TERG_04580 | -2.64 | -3.58 | NADP-specific glutamate dehydrogenase                                          |
| TERG_03826 | -2.77 | -3.57 | hypothetical protein                                                           |
| TERG_00490 | -3.13 | -5.24 | erythromycin esterase ( <i>T. tonsurans</i> )                                  |
| TERG_01619 | -3.20 | -2.35 | toxin biosynthesis protein (Tri7), putative ( <i>T. verrucosum</i> )           |
| TERG_12339 | -3.31 | -2.95 | hypothetical protein                                                           |
| TERG_05816 | -3.74 | -1.95 | hypothetical protein                                                           |
| TERG_02959 | -4.16 | -5.90 | hypothetical protein                                                           |
| TERG_02653 | -6.21 | -2.23 | hypothetical protein                                                           |

---

Gene expression values are expressed in log<sub>2</sub> fold change.
